# Supplementary material
Source: PubMed Central journal article supplement (PMC5302001)
Supplement: NIHMS843575-supplement-ESI.pdf [file NIHMS843575-supplement-ESI.pdf]

*ELECTRONIC SUPPORTING INFORMATION (ESI) to:*

## ***In vivo* photoacoustic tumor tomography using a quinoline-annulated porphyrin as NIR molecular contrast agent**

Michael Luciano,<sup>a,#</sup> Mohsen Erfanzadeh,<sup>b,#</sup> Feifei Zhou,<sup>b</sup> Zhu Hua,<sup>a</sup> Tobias Bornhütter,<sup>c</sup>  
Beate Röder,<sup>c</sup> Quing Zhu,<sup>b,c,\*</sup> Christian Brückner<sup>a,\*</sup>

*Department of Chemistry, University of Connecticut, Storrs, CT 06269-3060, USA*

*Department of Biomedical Engineering, University of Connecticut, Storrs, CT 06269-4157, USA*

*Institut für Physik, Humboldt-Universität zu Berlin, Newtonstraße 15, 12489 Berlin, Germany*

a Department of Chemistry, University of Connecticut

b Department of Biomedical Engineering, University of Connecticut

c Humboldt University

& Current address: Department of Biomedical Engineering, Washington University in St. Louis, St. Louis, MI 63105, USA

# Equal contributions

\* Authors to whom correspondence should be addressed: e-mail: quing.zhou@uconn.edu (QZ),  
c.bruckner@uconn.edu (CB)

## Table of Contents

|                                                                                                                                     |    |
|-------------------------------------------------------------------------------------------------------------------------------------|----|
| <b>Figure S1.</b> $^1\text{H}$ NMR spectrum (400 MHz, $\text{CD}_2\text{Cl}_2$ ) of <b>8</b> .                                      | 4  |
| <b>Figure S2.</b> $^{13}\text{C}$ NMR spectrum (100 MHz, $\text{CD}_2\text{Cl}_2$ ) of <b>8</b> .                                   | 5  |
| <b>Figure S3.</b> UV-vis spectrum ( $\text{CH}_2\text{Cl}_2$ ) of <b>8</b> .                                                        | 6  |
| <b>Figure S4.</b> FT-IR spectrum (neat, diamond ATR) of <b>8</b> .                                                                  | 6  |
| <b>Figure S5.</b> HR-MS (ESI <sup>+</sup> , 100% $\text{CH}_3\text{CN}$ , TOF) of <b>8</b> .                                        | 7  |
| <b>Figure S6.</b> $^1\text{H}$ NMR spectrum (400 MHz, $\text{CD}_2\text{Cl}_2$ ) of <b>9</b> .                                      | 8  |
| <b>Figure S7.</b> $^{13}\text{C}$ NMR spectrum (100 MHz, $\text{CD}_2\text{Cl}_2$ ) of <b>9</b> .                                   | 9  |
| <b>Figure S8.</b> UV-vis spectrum ( $\text{CH}_2\text{Cl}_2$ ) of <b>9</b> .                                                        | 10 |
| <b>Figure S9.</b> FT-IR spectrum (neat, diamond ATR) of <b>9</b> .                                                                  | 10 |
| <b>Figure S10.</b> HR-MS (ESI <sup>+</sup> , 100% $\text{CH}_3\text{CN}$ , TOF) of <b>9</b> .                                       | 11 |
| <b>Figure S11.</b> $^1\text{H}$ NMR spectrum (400 MHz, $\text{CDCl}_3$ ) of <b>5b</b> .                                             | 12 |
| <b>Figure S12.</b> $^{13}\text{C}$ NMR spectrum (100 MHz, $\text{CDCl}_3$ ) of <b>5b</b> .                                          | 13 |
| <b>Figure S13.</b> UV-vis spectrum ( $\text{CH}_2\text{Cl}_2$ ) of <b>5b</b> .                                                      | 14 |
| <b>Figure S14.</b> FT-IR spectrum (neat, diamond ATR) of <b>5b</b> .                                                                | 14 |
| <b>Figure S15.</b> HR-MS (ESI <sup>+</sup> , 100% $\text{CH}_3\text{CN}$ , TOF) of <b>5b</b> .                                      | 15 |
| <b>Figure S16.</b> $^1\text{H}$ NMR spectrum (400 MHz, $\text{CD}_2\text{Cl}_2$ ) of <b>4b</b> .                                    | 16 |
| <b>Figure S17.</b> $^{13}\text{C}$ NMR spectrum (100 MHz, $\text{CD}_2\text{Cl}_2$ ) of <b>4b</b> .                                 | 17 |
| <b>Figure S18.</b> UV-vis spectrum ( $\text{CH}_2\text{Cl}_2$ ) of <b>4b</b> .                                                      | 18 |
| <b>Figure S19.</b> FT-IR spectrum (neat, diamond ATR) of <b>4b</b> .                                                                | 18 |
| <b>Figure S20.</b> HR-MS (ESI <sup>+</sup> , 100% $\text{CH}_3\text{CN}$ , TOF) of <b>4b</b> .                                      | 19 |
| <b>Figure S21.</b> $^1\text{H}$ NMR spectrum (400 MHz, $\text{DMSO-d}_6$ ) of <b>4c</b> .                                           | 20 |
| <b>Figure S22.</b> $^{13}\text{C}$ NMR spectrum (100 MHz, $\text{DMSO-d}_6$ ) of <b>4c</b> .                                        | 21 |
| <b>Figure S23.</b> UV-vis spectrum ( $\text{MeOH}$ ) of <b>4c</b> .                                                                 | 22 |
| <b>Figure S24.</b> FT-IR spectrum (neat, diamond ATR) of <b>4c</b> .                                                                | 22 |
| <b>Figure S25.</b> HR-MS (ESI <sup>+</sup> , 100% $\text{CH}_3\text{CN}$ , TOF) of <b>4c</b> .                                      | 23 |
| <b>Figure S26.</b> $^1\text{H}$ NMR spectrum (400 MHz, $\text{DMSO-d}_6$ ) of <b>4c<sup>Zn</sup></b> .                              | 24 |
| <b>Figure S27.</b> $^{13}\text{C}$ NMR spectrum (100 MHz, $\text{CD}_2\text{Cl}_2/10\%$ $\text{MeOD}$ ) of <b>4c<sup>Zn</sup></b> . | 25 |
| <b>Figure S28.</b> UV-vis spectrum ( $\text{MeOH}$ ) of <b>4c<sup>Zn</sup></b> .                                                    | 26 |
| <b>Figure S29.</b> FT-IR spectrum (neat, diamond ATR) of <b>4c<sup>Zn</sup></b> .                                                   | 26 |

|                                                                                                                                                        |    |
|--------------------------------------------------------------------------------------------------------------------------------------------------------|----|
| <b>Figure S30.</b> HR-MS (ESI <sup>+</sup> , 100% CH <sub>3</sub> CN, TOF) of <b>4c<sup>zn</sup></b> .                                                 | 27 |
| <b>Figure S31.</b> <sup>1</sup> H NMR spectrum (500 MHz, CD <sub>2</sub> Cl <sub>2</sub> ) of <b>4d</b> .                                              | 28 |
| <b>Figure S32.</b> <sup>13</sup> C NMR spectrum (125 MHz, CD <sub>2</sub> Cl <sub>2</sub> ) of <b>4d</b> .                                             | 29 |
| <b>Figure S33.</b> UV-vis spectrum (CH <sub>2</sub> Cl <sub>2</sub> ) of <b>4d</b> .                                                                   | 30 |
| <b>Figure S34.</b> HR-MS (ESI <sup>+</sup> , 100% CH <sub>3</sub> CN, TOF) of <b>4d</b> .                                                              | 31 |
| <b>Figure S35.</b> <sup>1</sup> H NMR spectrum (400 MHz, CD <sub>2</sub> Cl <sub>2</sub> ) of <b>4e</b> .                                              | 32 |
| <b>Figure S36.</b> UV-vis spectrum (H <sub>2</sub> O) of <b>4e</b> .                                                                                   | 33 |
| <b>Figure S37.</b> Absorption spectra of <b>4e</b> (PQP) in CH <sub>2</sub> Cl <sub>2</sub> , H <sub>2</sub> O and H <sub>2</sub> O-Triton-X solution. | 33 |
| <b>Figure S38.</b> HR-MS (ESI <sup>+</sup> , 100% CH <sub>3</sub> CN, TOF) of <b>4e</b> .                                                              | 34 |
| <b>Figure S39.</b> HPLC trace, UV-vis detector, of <b>4e</b> .                                                                                         | 35 |
| <b>Figure S40.</b> <sup>1</sup> H NMR spectrum (500 MHz, DMSO-d <sub>6</sub> ) of <b>4f</b> .                                                          | 36 |
| <b>Figure S41.</b> <sup>19</sup> F NMR spectrum (470 MHz, DMSO-d <sub>6</sub> ) of <b>4f</b> .                                                         | 37 |
| <b>Figure S42.</b> UV-vis and Fluorescence emission spectrum (MeOH, λ <sub>excitation</sub> = 441 nm) of <b>4f</b> .                                   | 37 |
| <b>Figure S43.</b> HR-MS (ESI <sup>+</sup> , 100% CH <sub>3</sub> CN, TOF) of <b>4f</b> .                                                              | 38 |
| <b>Figure S44.</b> <sup>1</sup> H NMR spectrum (400 MHz, CD <sub>2</sub> Cl <sub>2</sub> , pre-saturated at 3.6 ppm) of <b>4g</b> .                    | 39 |
| <b>Figure S45.</b> <sup>19</sup> F NMR spectrum (376 MHz, CD <sub>2</sub> Cl <sub>2</sub> ) of <b>4g</b> .                                             | 40 |
| <b>Figure S46.</b> UV-vis and Fluorescence emission spectrum (MeOH, λ <sub>excitation</sub> = 441 nm) of <b>4g</b> .                                   | 40 |
| <b>Figure S47.</b> MALDI-TOF spectrum (100% DHBA) of <b>4g</b> .                                                                                       | 41 |
| <b>Figure S48.</b> HPLC trace, UV-vis detector, of <b>4g</b> (silica, mobile phase: CH <sub>2</sub> Cl <sub>2</sub> /5% MeOH).                         | 42 |
| <b>Figure S49.</b> A mouse tumor before injection of <b>4e</b> .                                                                                       | 43 |
| <b>Figure S50.</b> A mouse tumor 48 h after injection of 100 μL of a 33 mM solution of <b>4e</b> in PBS.                                               | 43 |
| <b>Figure S51.</b> LC-MS of mouse urine extract (CH <sub>2</sub> Cl <sub>2</sub> ), obtained after injection of <b>4e</b> .                            | 44 |
| <b>Figure S52.</b> UV-vis spectrum (CH <sub>2</sub> Cl <sub>2</sub> ) of mouse (diluted) urine obtained after injection of <b>4e</b> .                 | 45 |

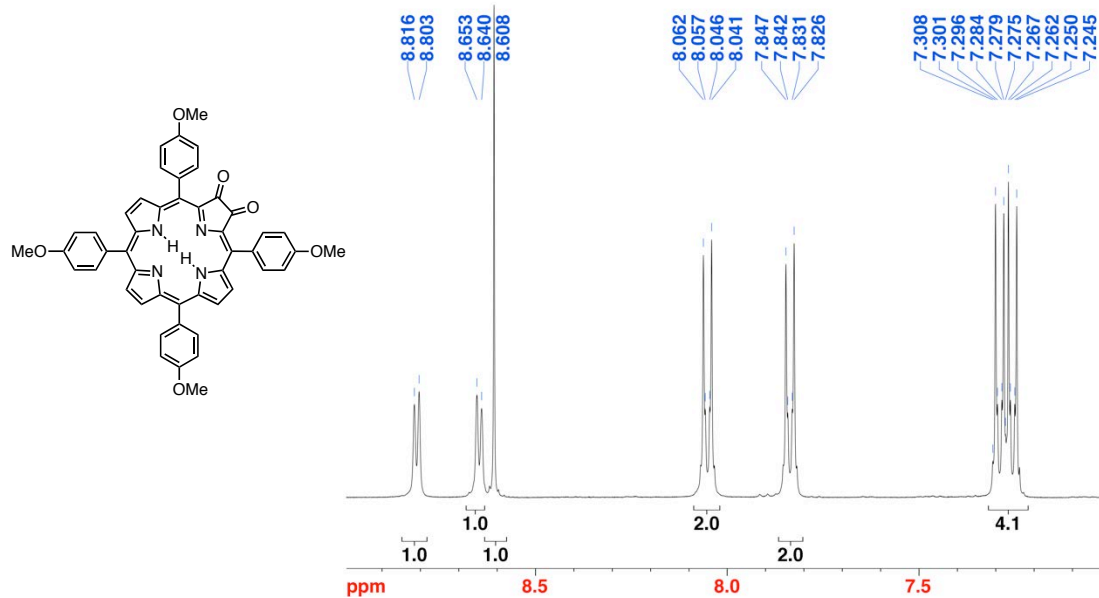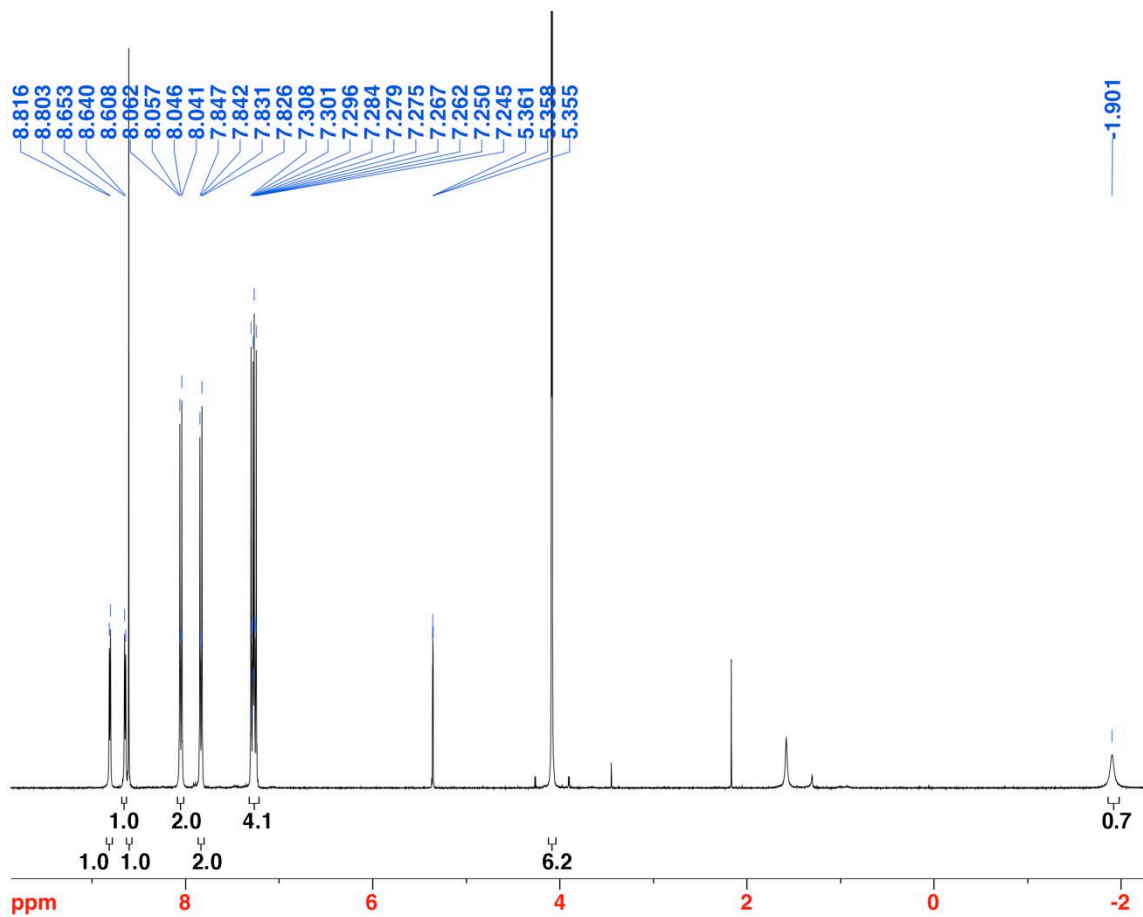

Figure S1. <sup>1</sup>H NMR spectrum (400 MHz, CD<sub>2</sub>Cl<sub>2</sub>) of **8**.

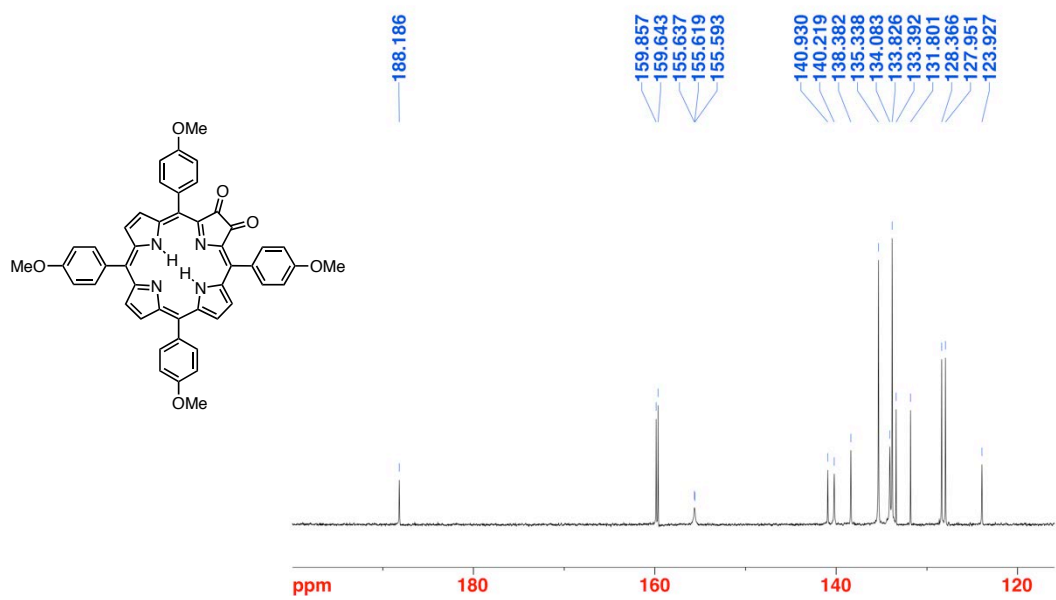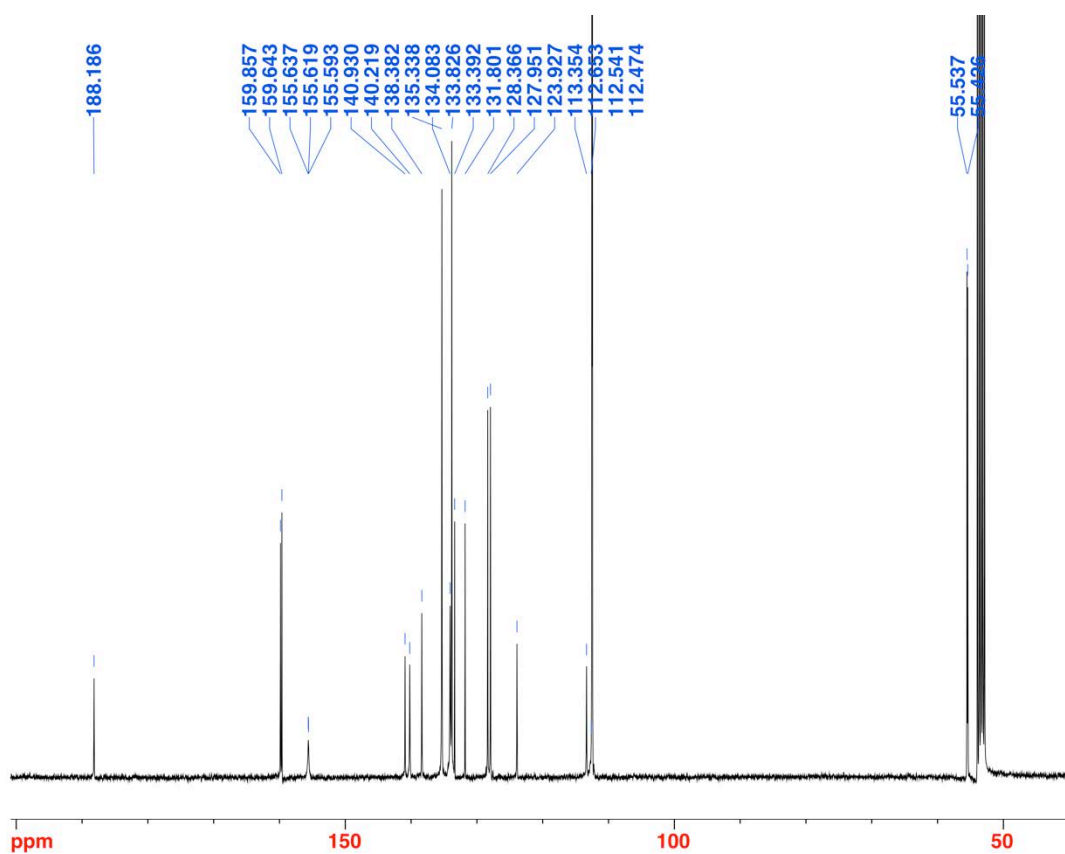

Figure S2. <sup>13</sup>C NMR spectrum (100 MHz, CD<sub>2</sub>Cl<sub>2</sub>) of 8.

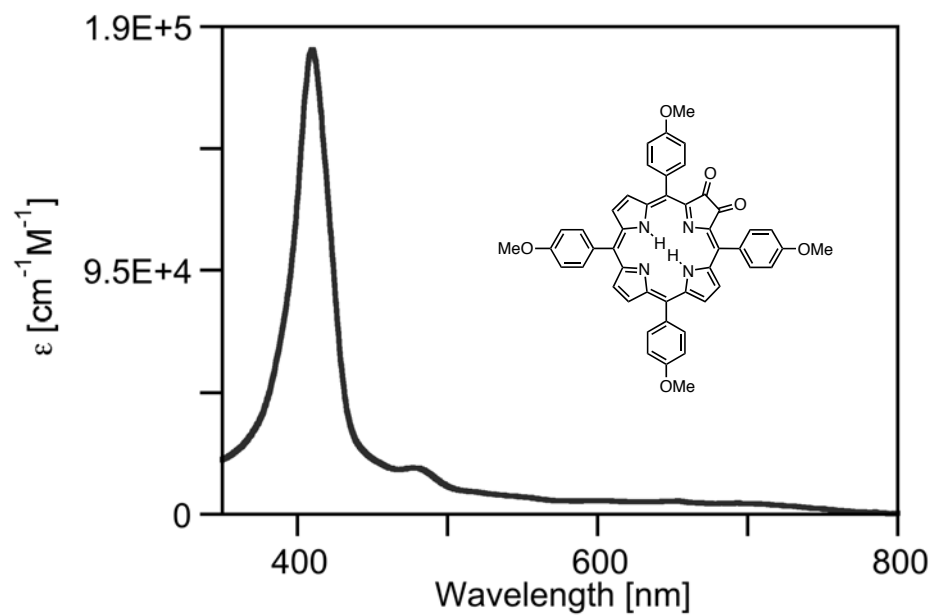

**Figure S3.** UV-vis spectrum ( $\text{CH}_2\text{Cl}_2$ ) of **8**.

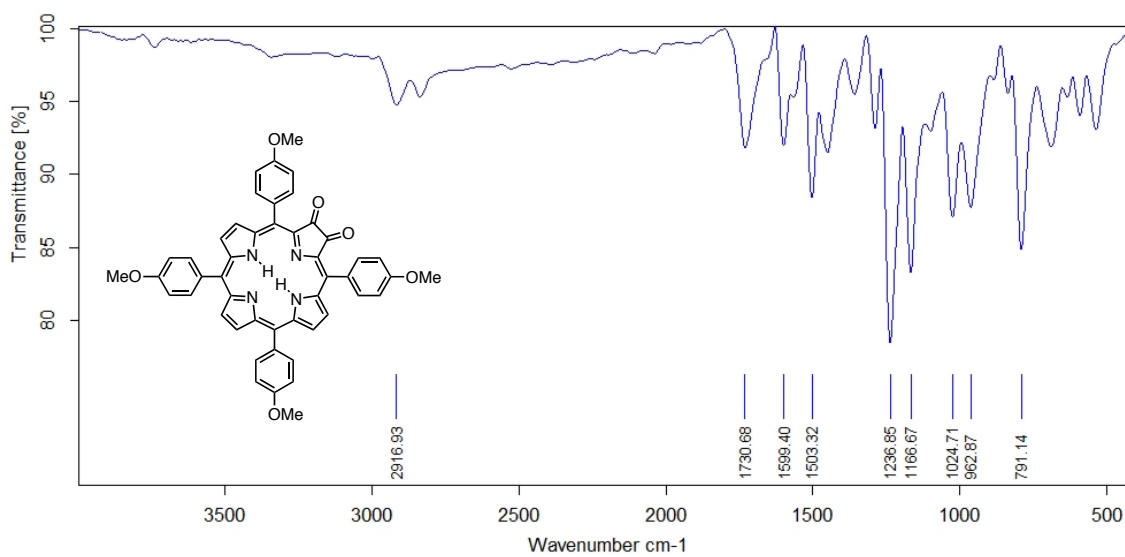

**Figure S4.** FT-IR spectrum (neat, diamond ATR) of **8**.

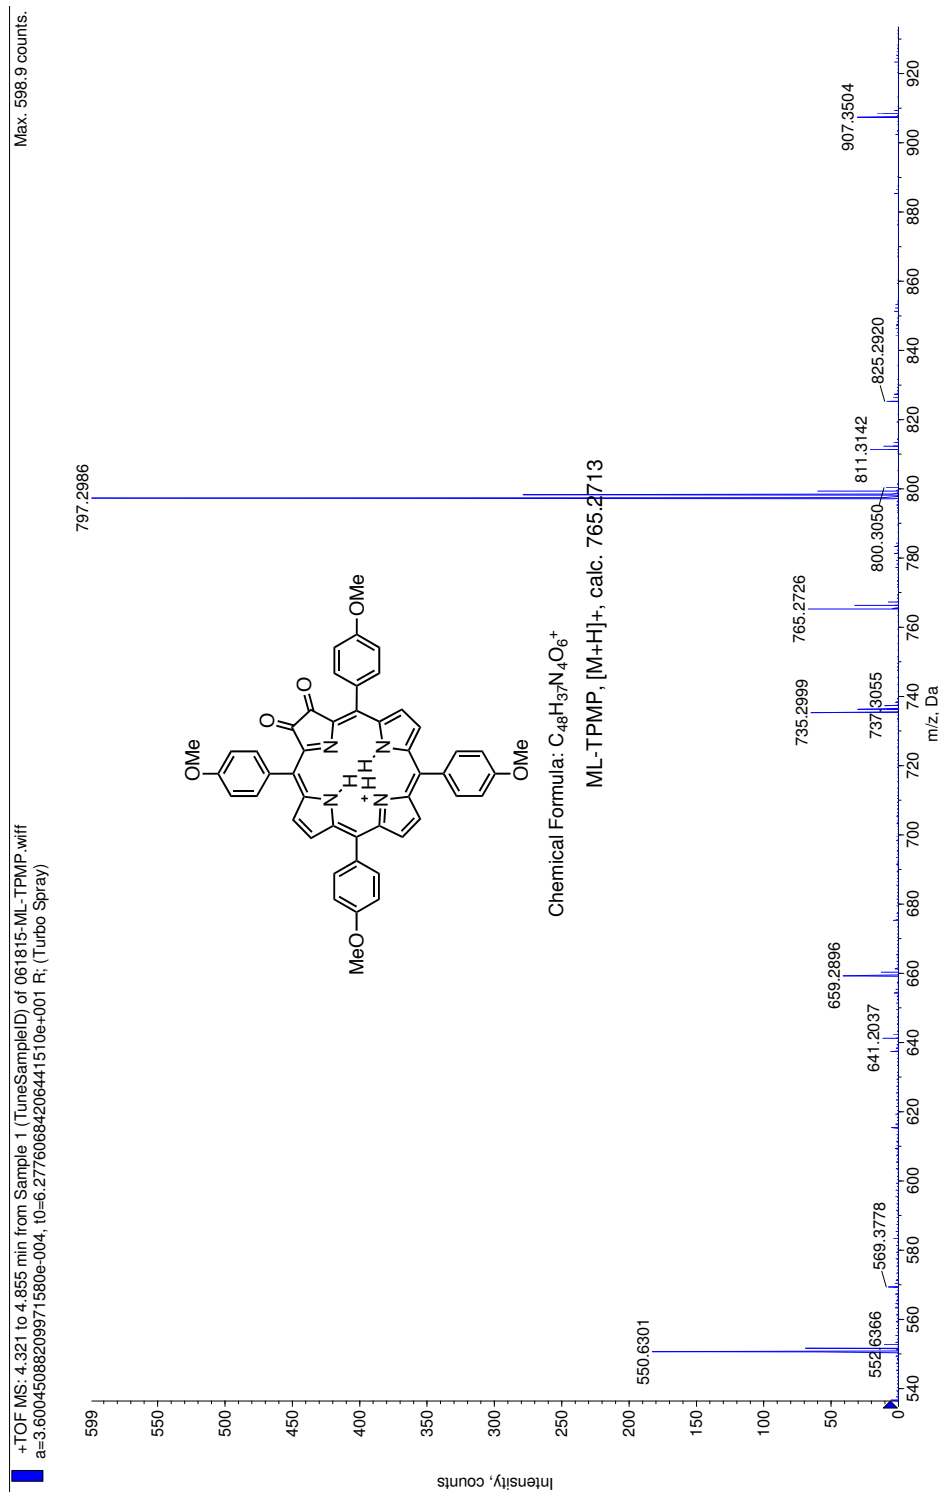

Figure S5. HR-MS (ESI<sup>+</sup>, 100% CH<sub>3</sub>CN, TOF) of **8**.

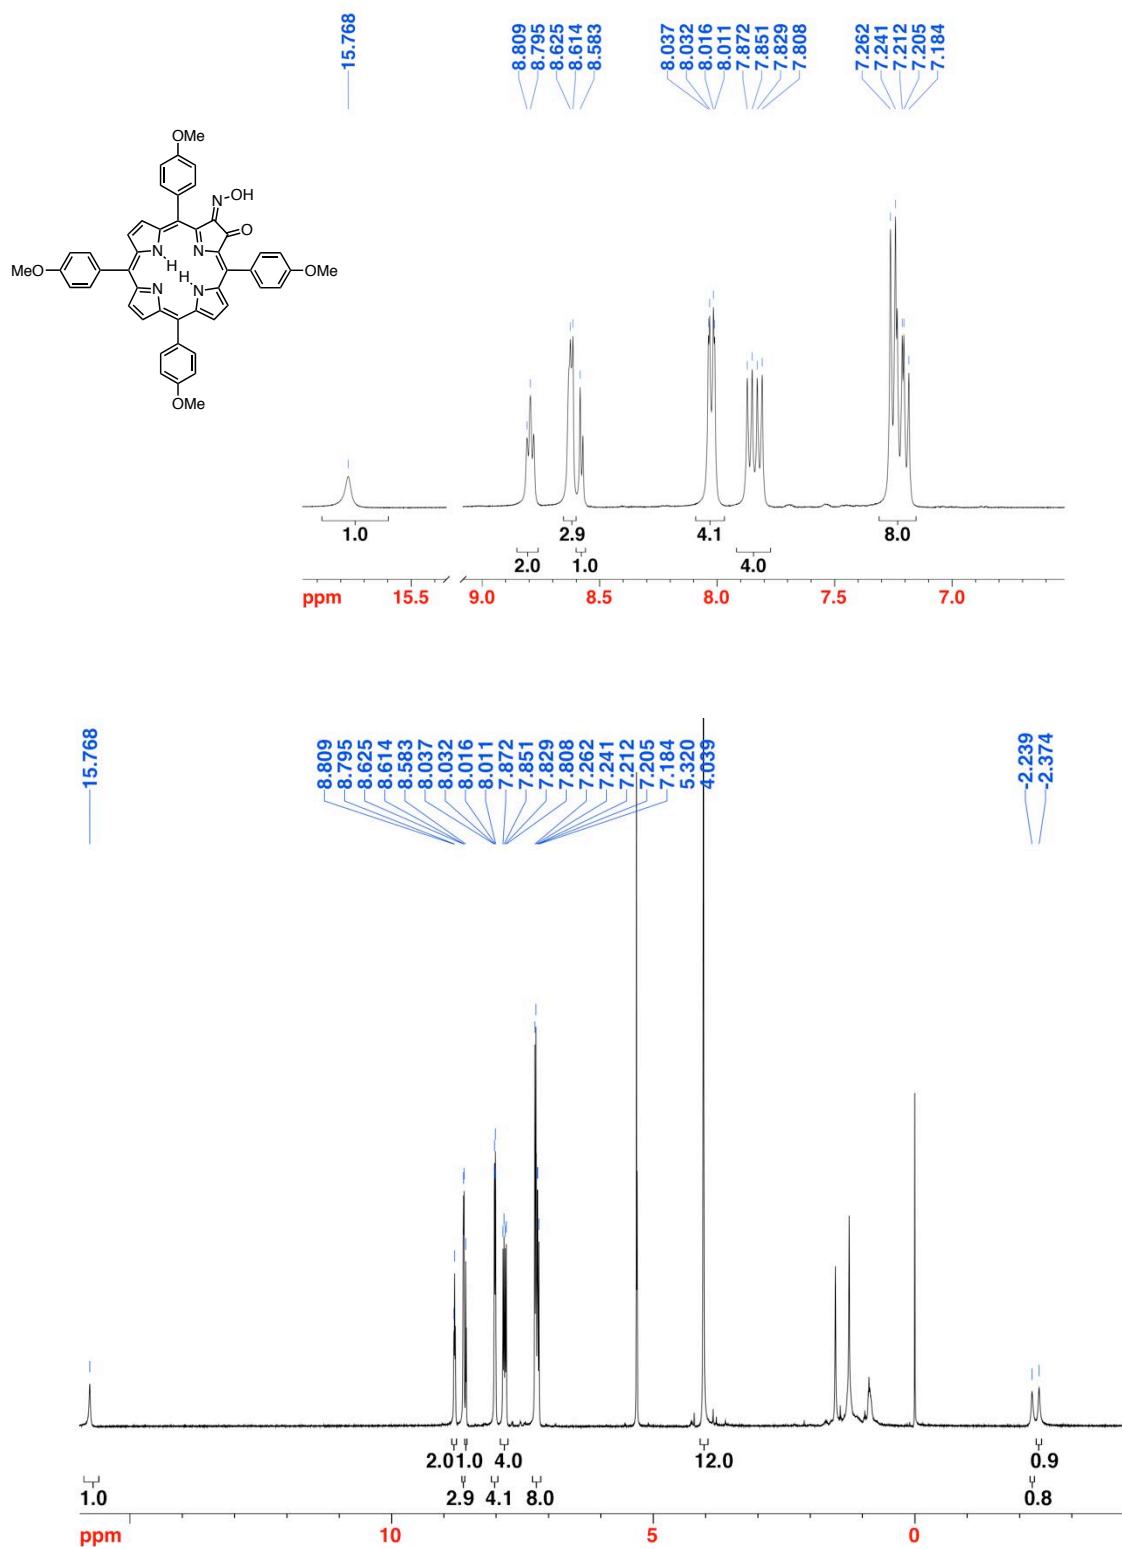

Figure S6.  $^1\text{H}$  NMR spectrum (400 MHz,  $\text{CD}_2\text{Cl}_2$ ) of **9**.



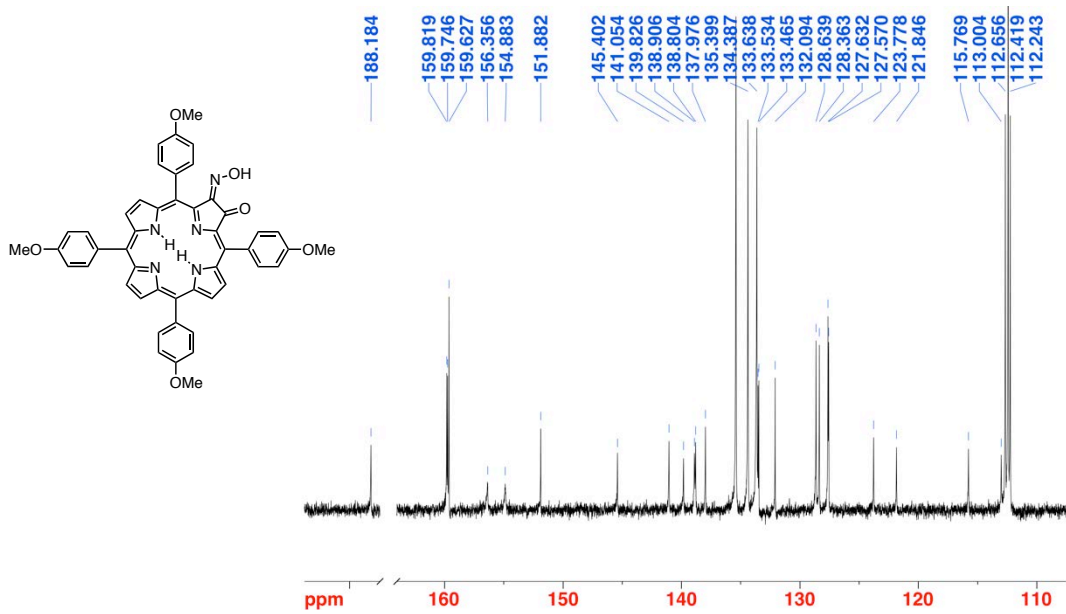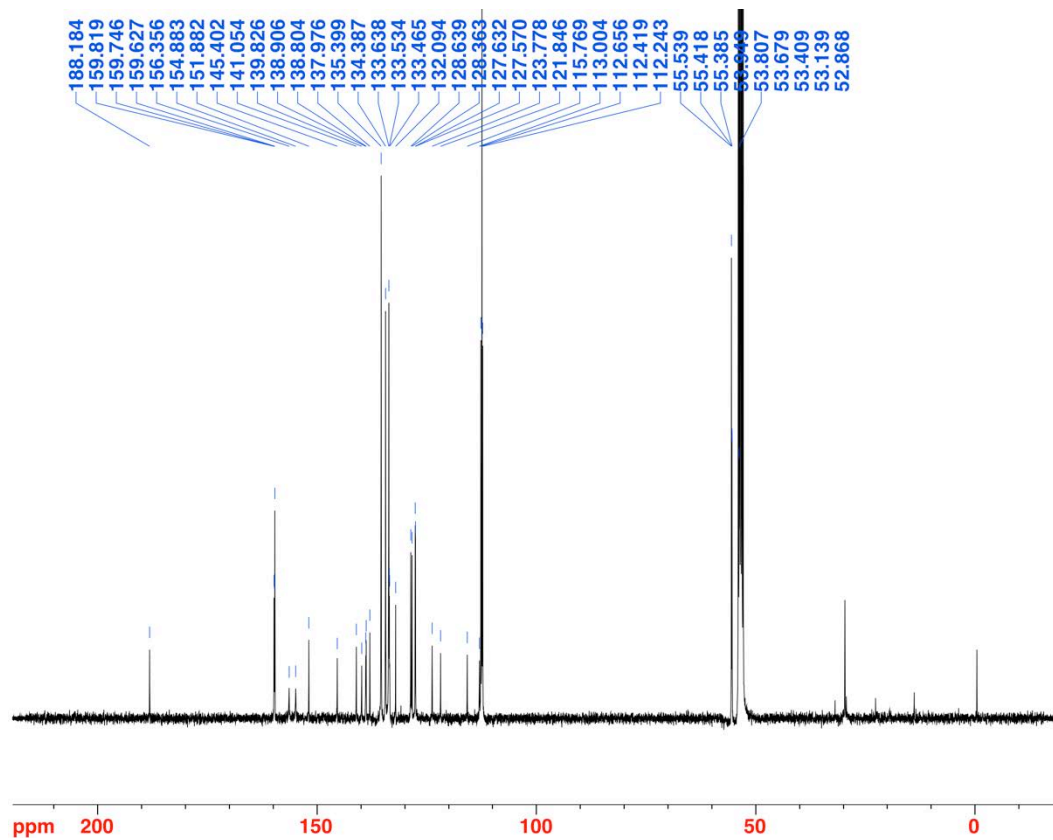

Figure S7.  $^{13}\text{C}$  NMR spectrum (100 MHz,  $\text{CD}_2\text{Cl}_2$ ) of 9.

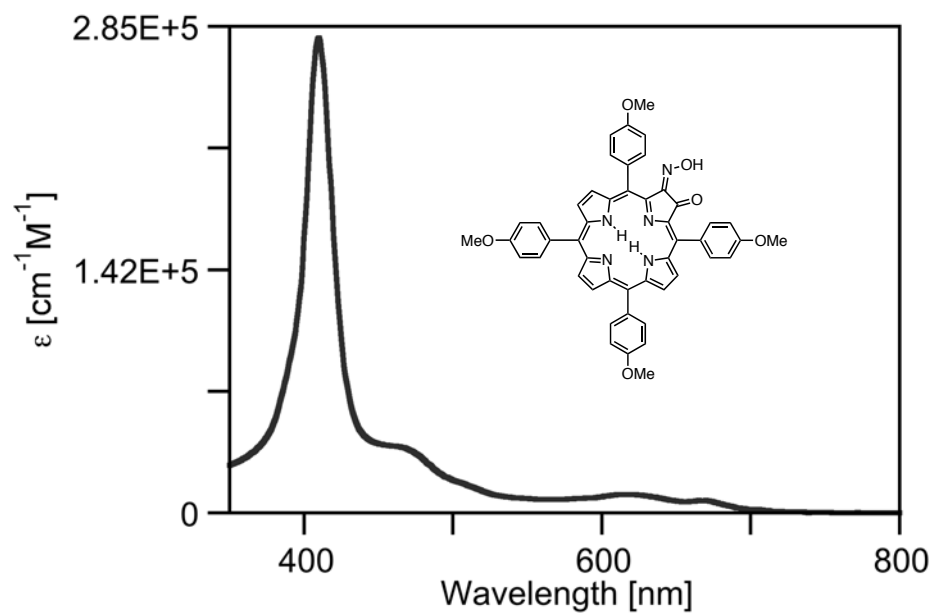

**Figure S8.** UV-vis spectrum ( $\text{CH}_2\text{Cl}_2$ ) of **9**.

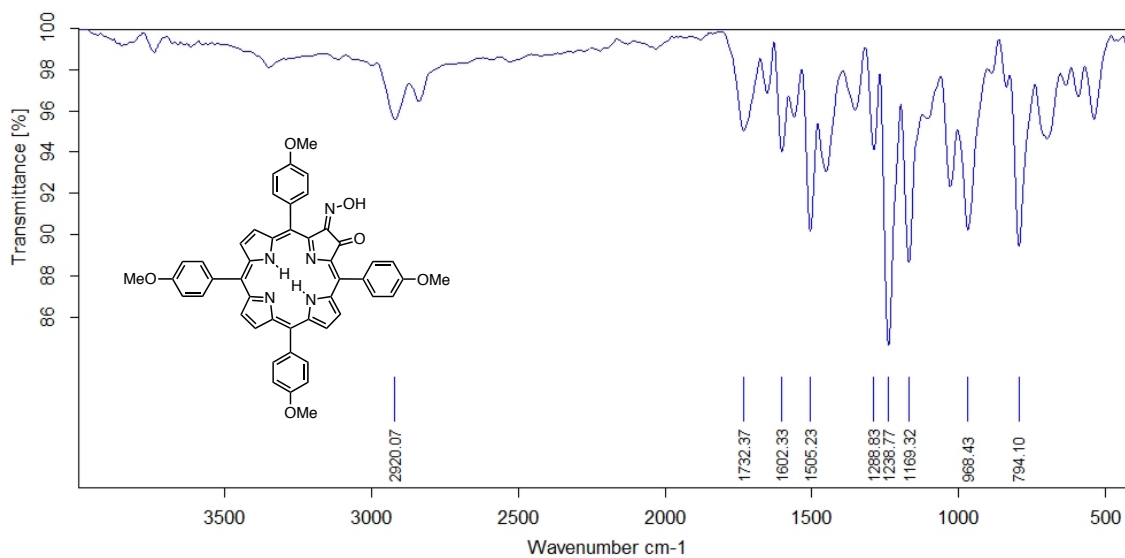

**Figure S9.** FT-IR spectrum (neat, diamond ATR) of **9**.

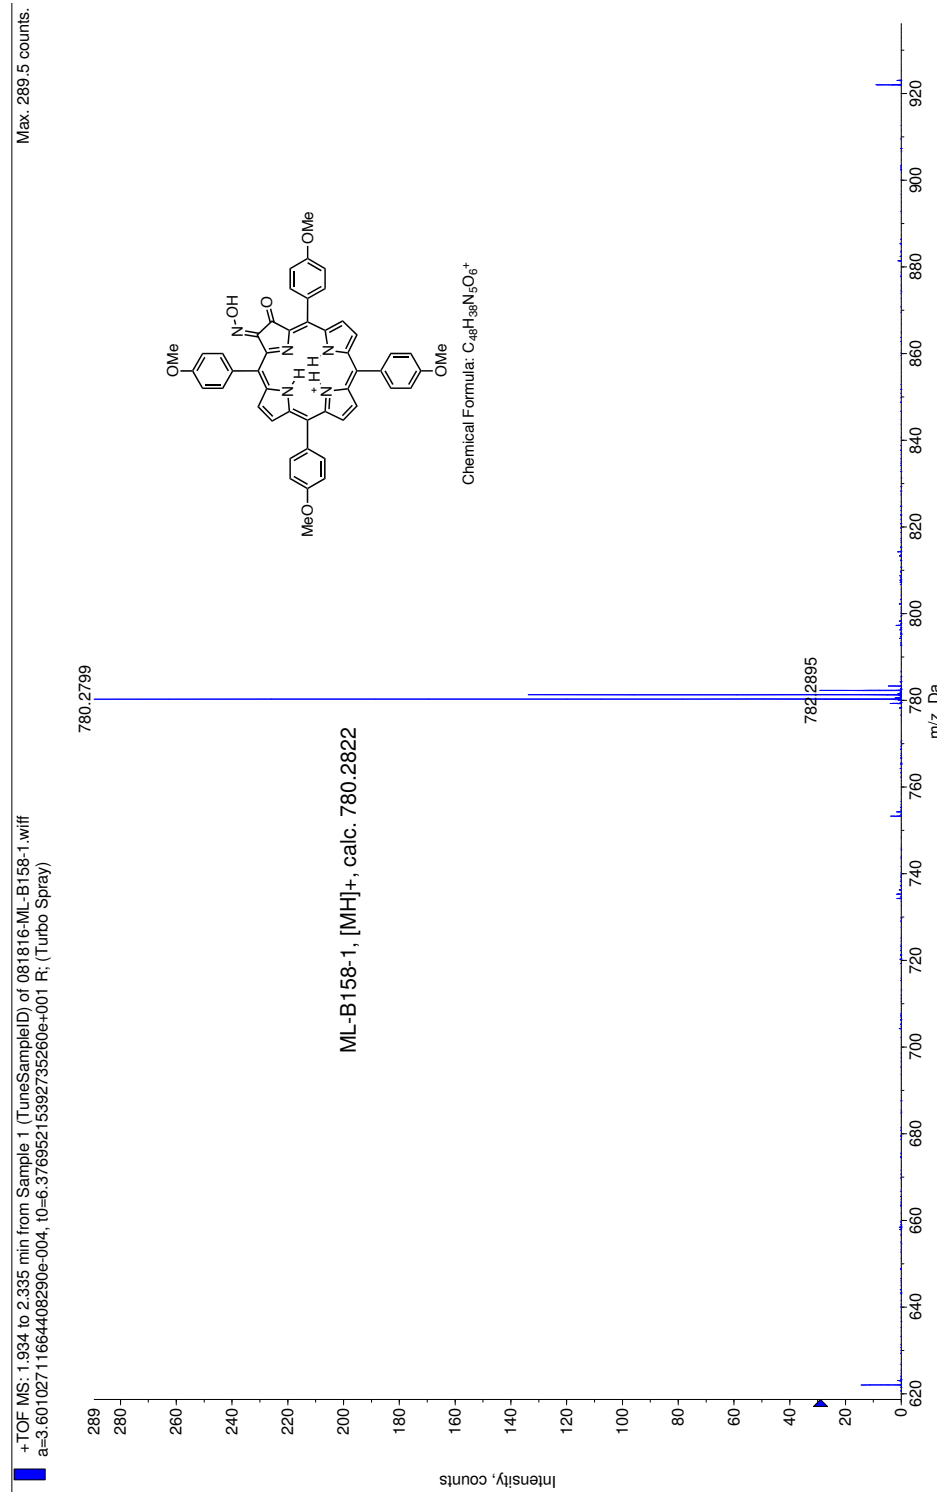

**Figure S10.** HR-MS (ESI<sup>+</sup>, 100% CH<sub>3</sub>CN, TOF) of **9**.

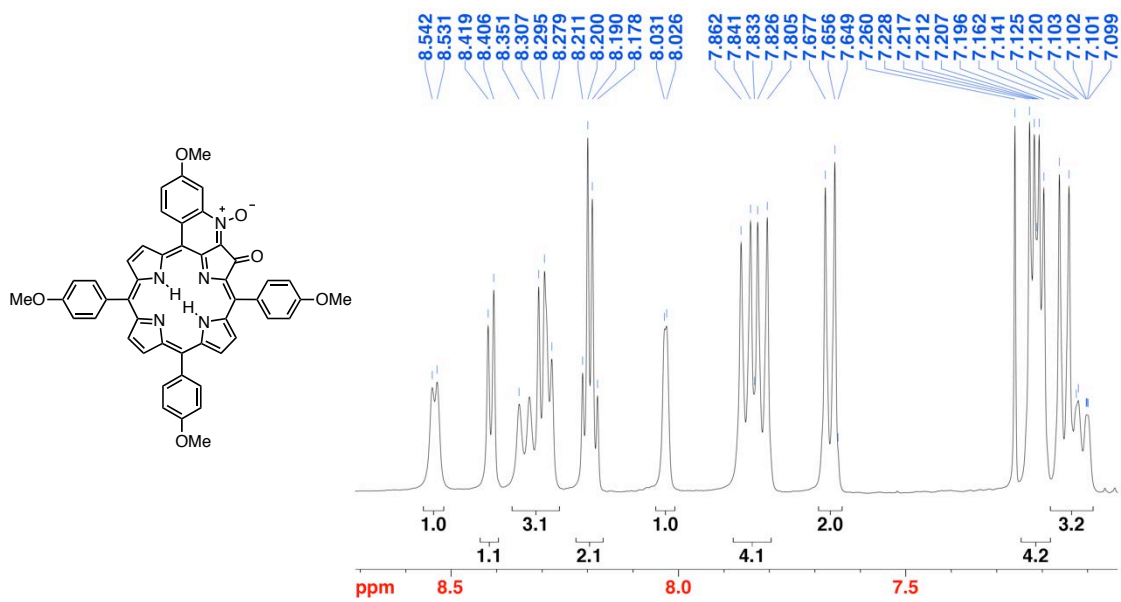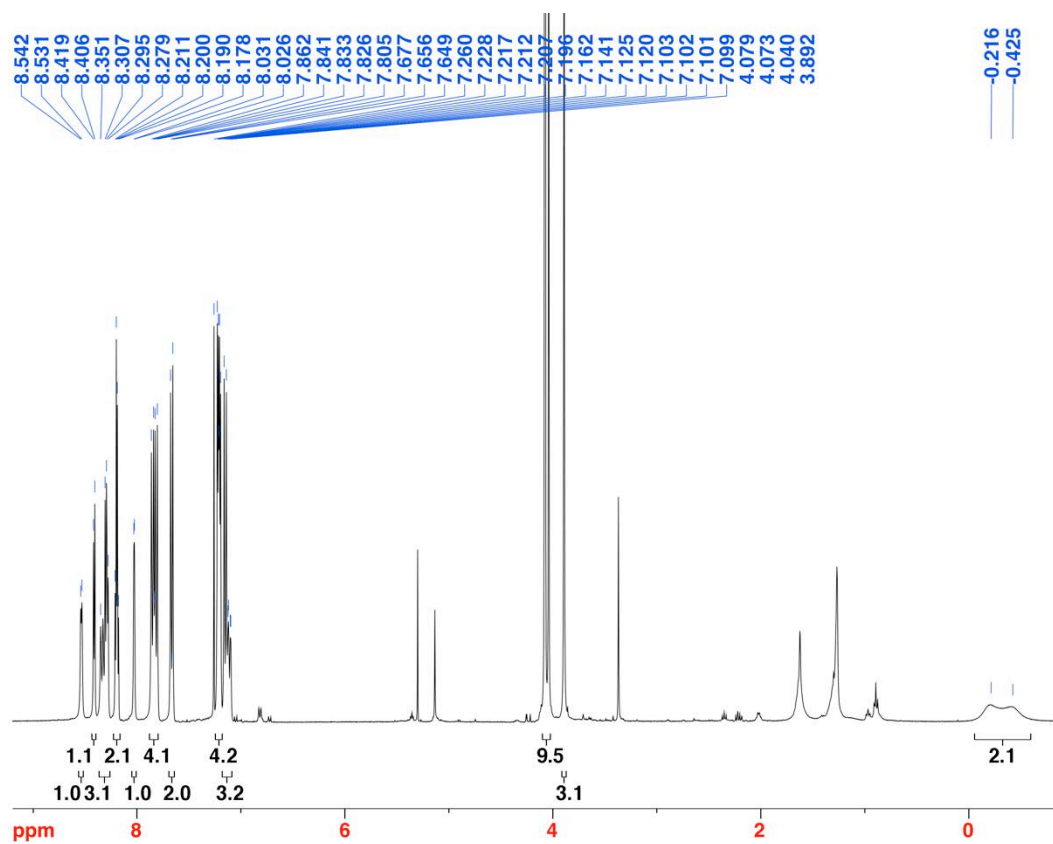

Figure S11. <sup>1</sup>H NMR spectrum (400 MHz, CDCl<sub>3</sub>) of 5b.

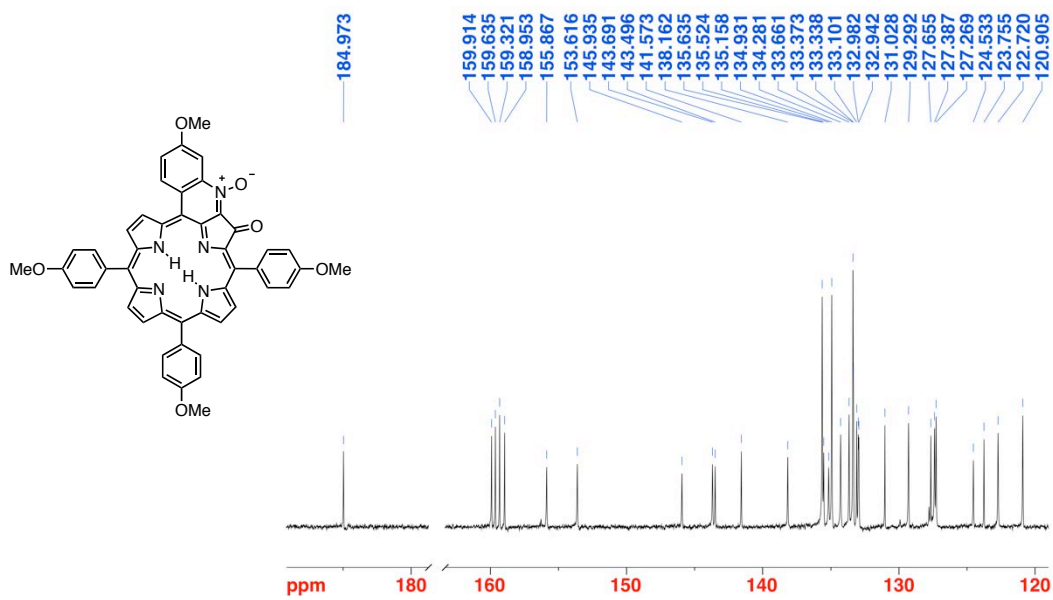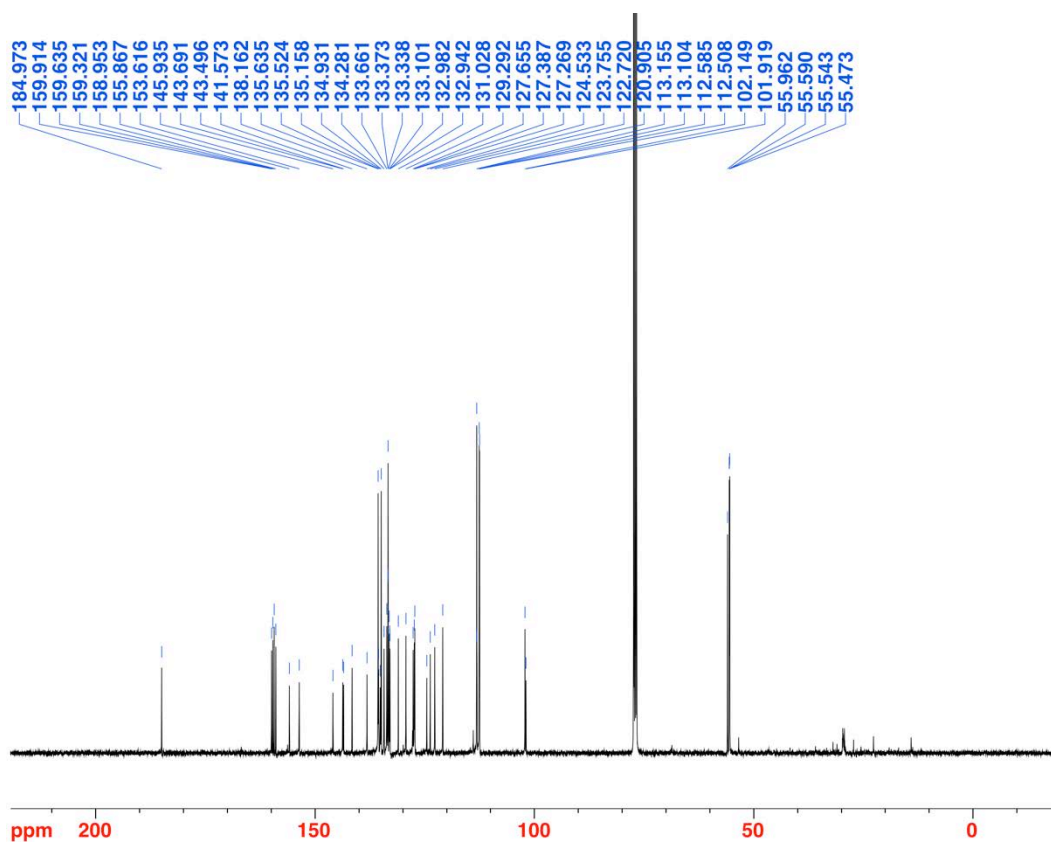

Figure S12. <sup>13</sup>C NMR spectrum (100 MHz, CDCl<sub>3</sub>) of 5b.

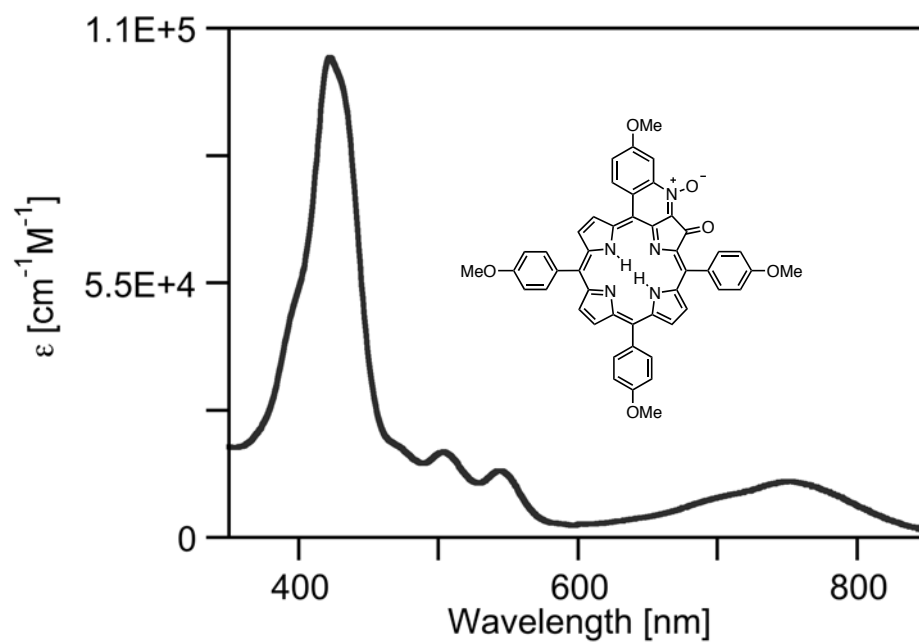

**Figure S13.** UV-vis spectrum ( $\text{CH}_2\text{Cl}_2$ ) of **5b**.

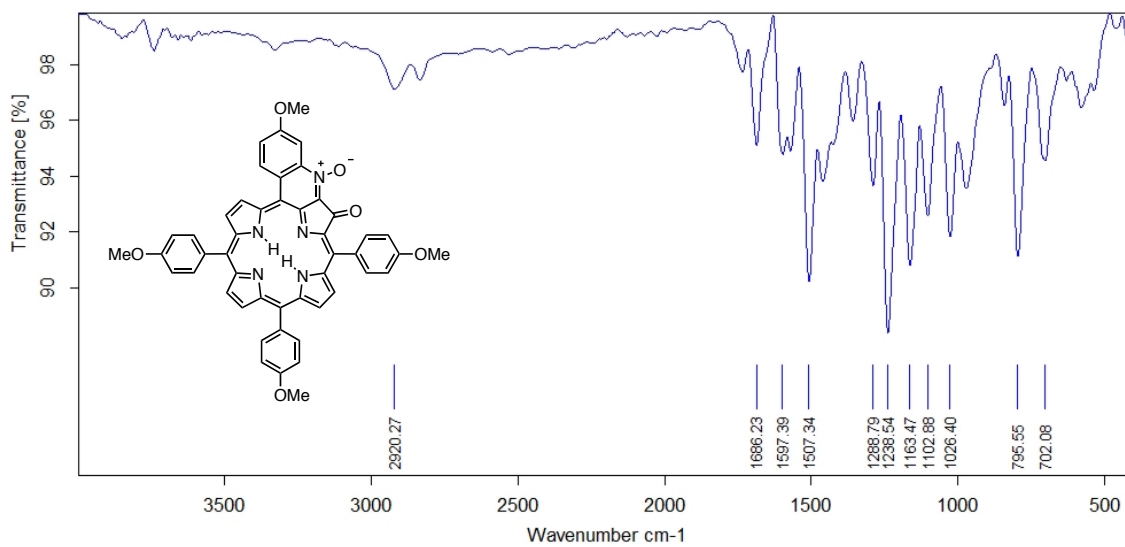

**Figure S14.** FT-IR spectrum (neat, diamond ATR) of **5b**.

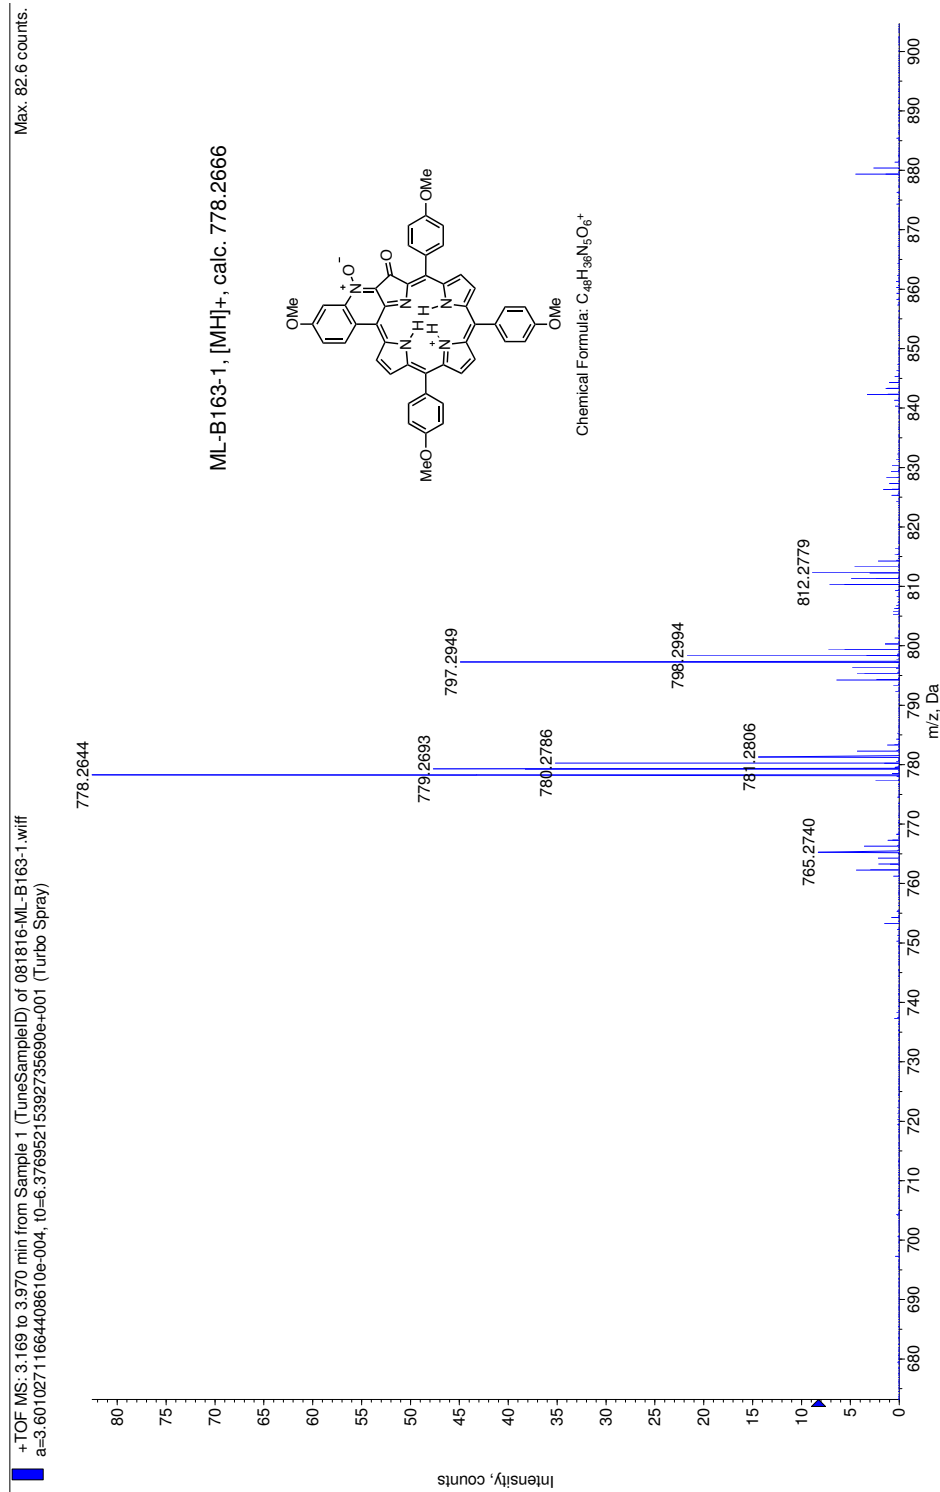

**Figure S15.** HR-MS (ESI<sup>+</sup>, 100% CH<sub>3</sub>CN, TOF) of **5b**.

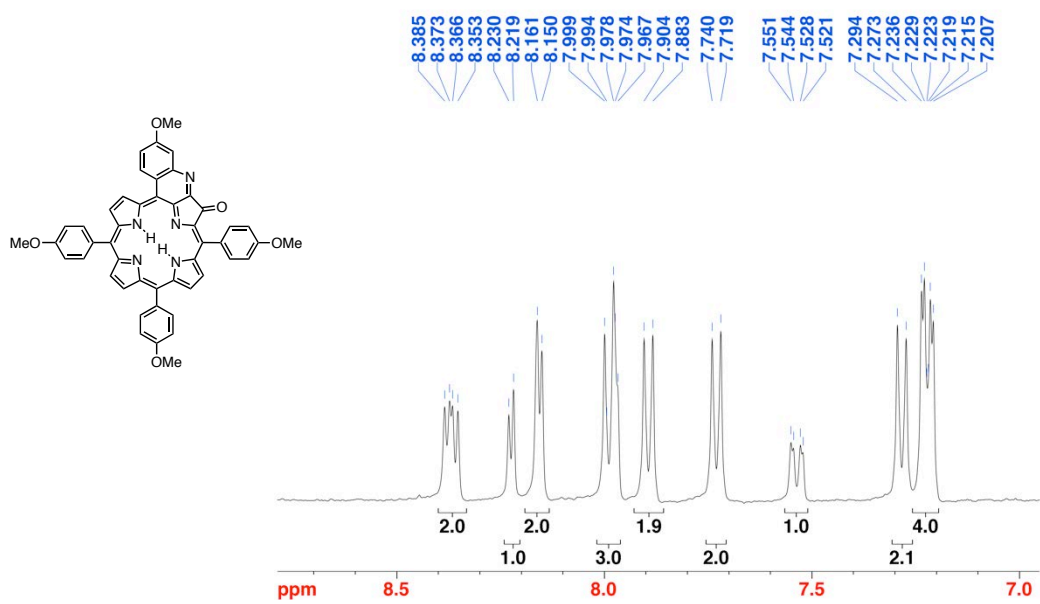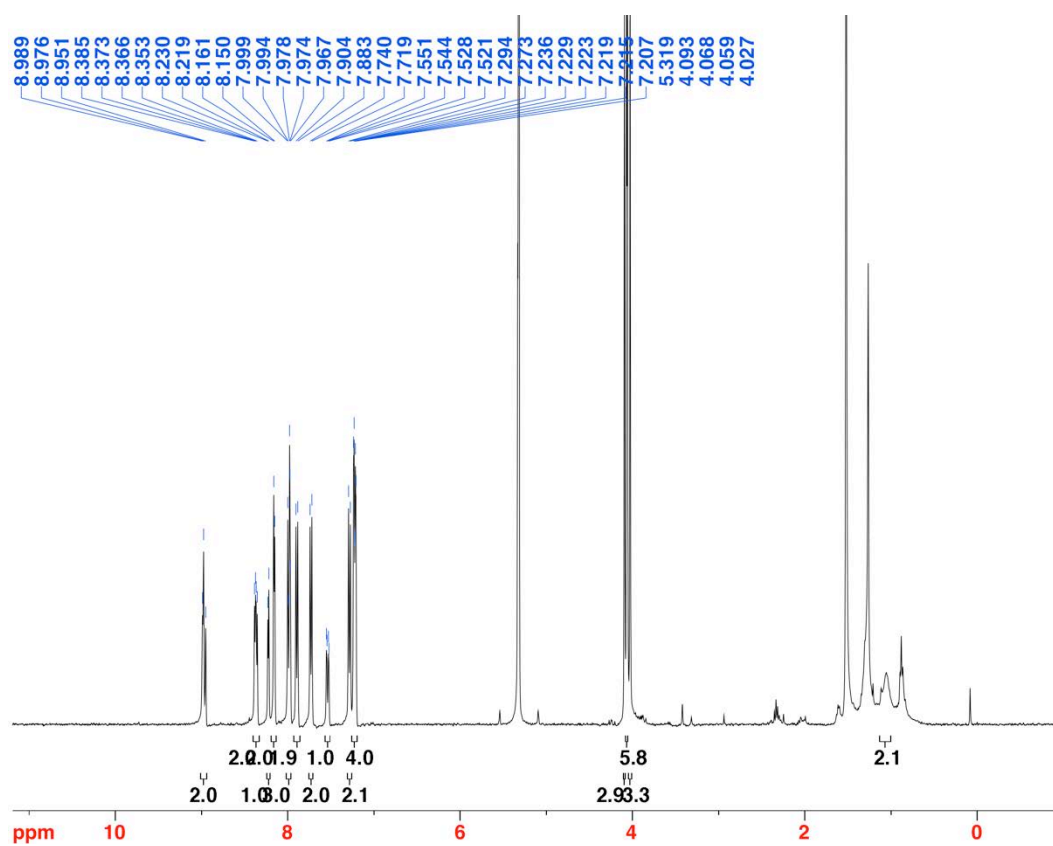

**Figure S16.**  $^1\text{H NMR}$  spectrum (400 MHz,  $\text{CD}_2\text{Cl}_2$ ) of **4b**.



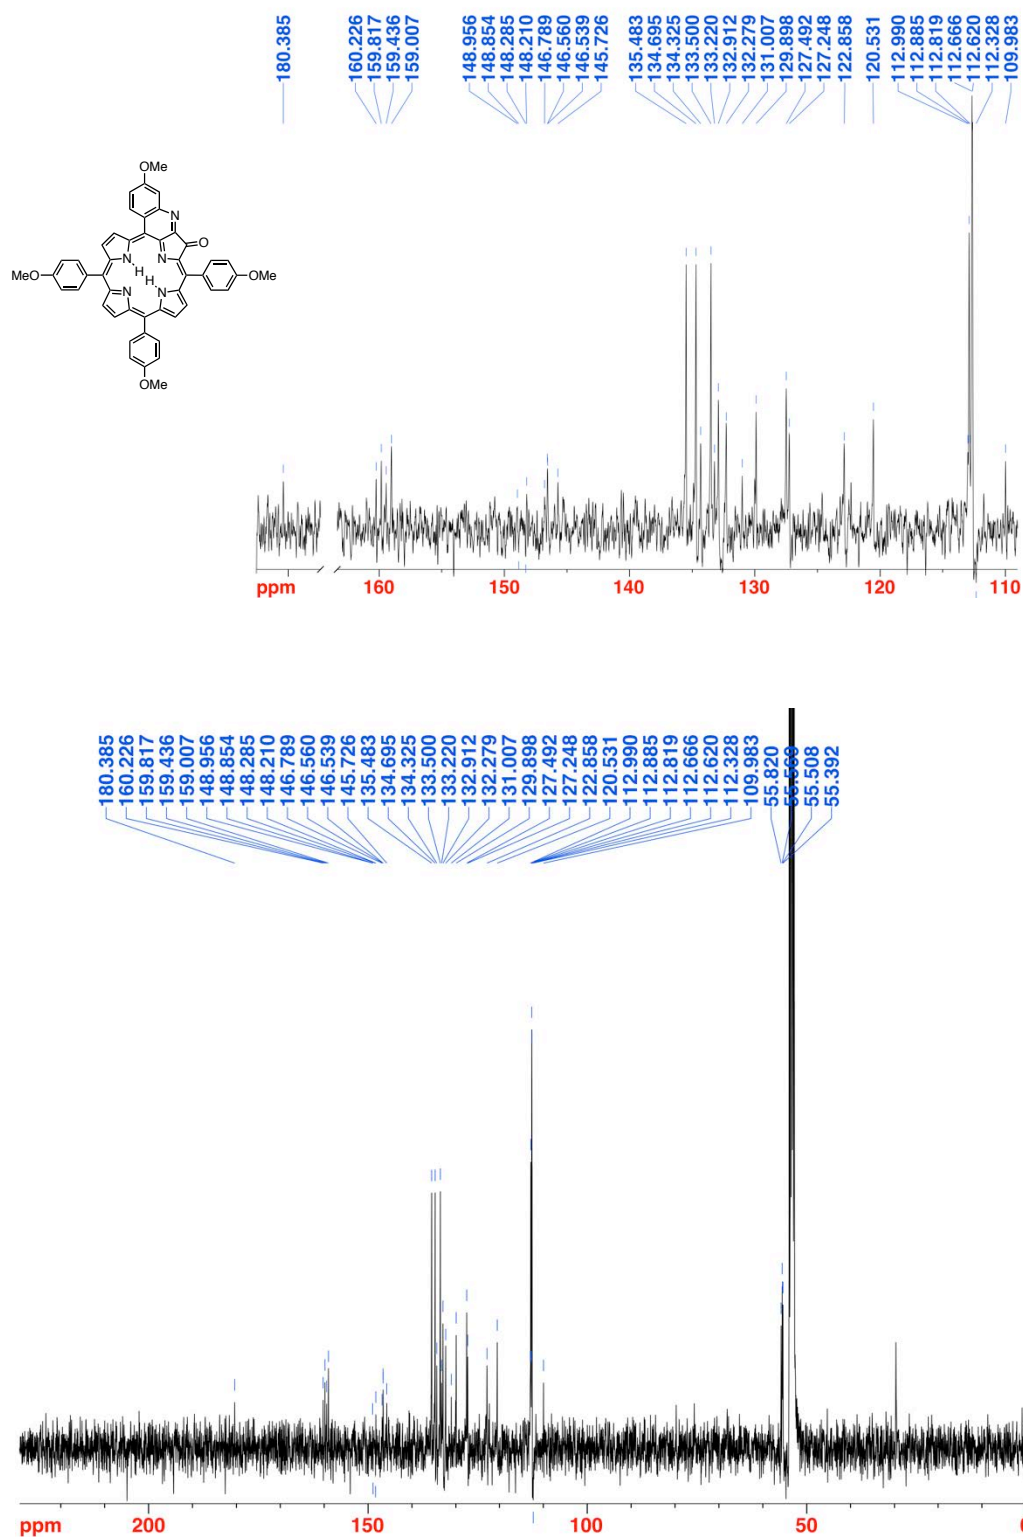

Figure S17. <sup>13</sup>C NMR spectrum (100 MHz, CD<sub>2</sub>Cl<sub>2</sub>) of **4b** (the compound has limited solubility).

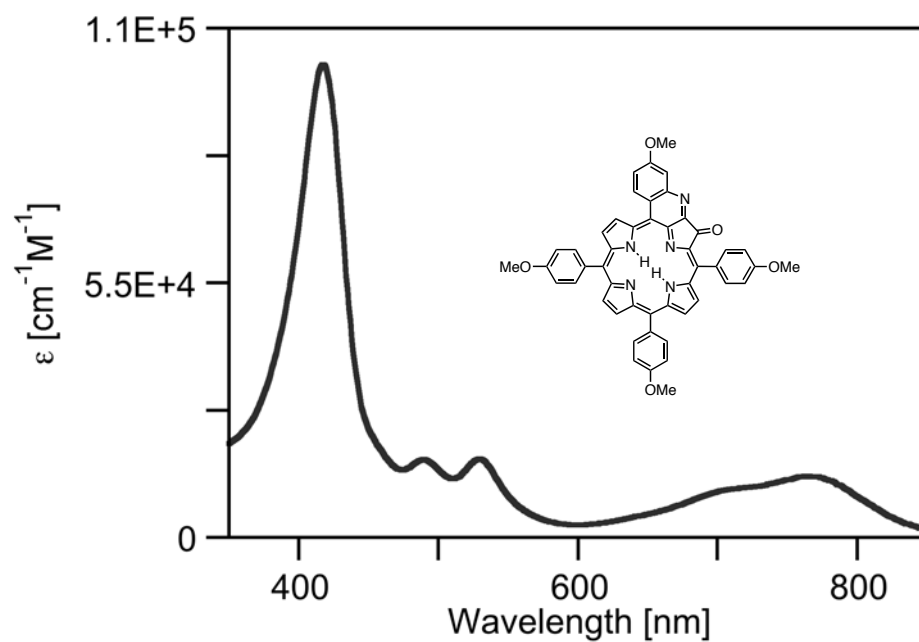

**Figure S18.** UV-vis spectrum ( $\text{CH}_2\text{Cl}_2$ ) of **4b**.

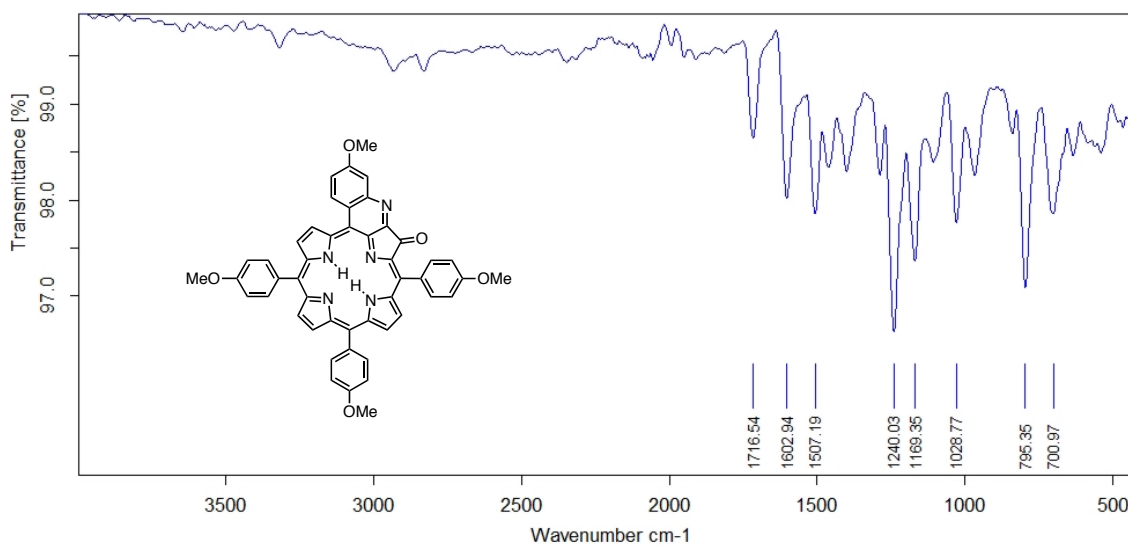

**Figure S19.** FT-IR spectrum (neat, diamond ATR) of **4b**.

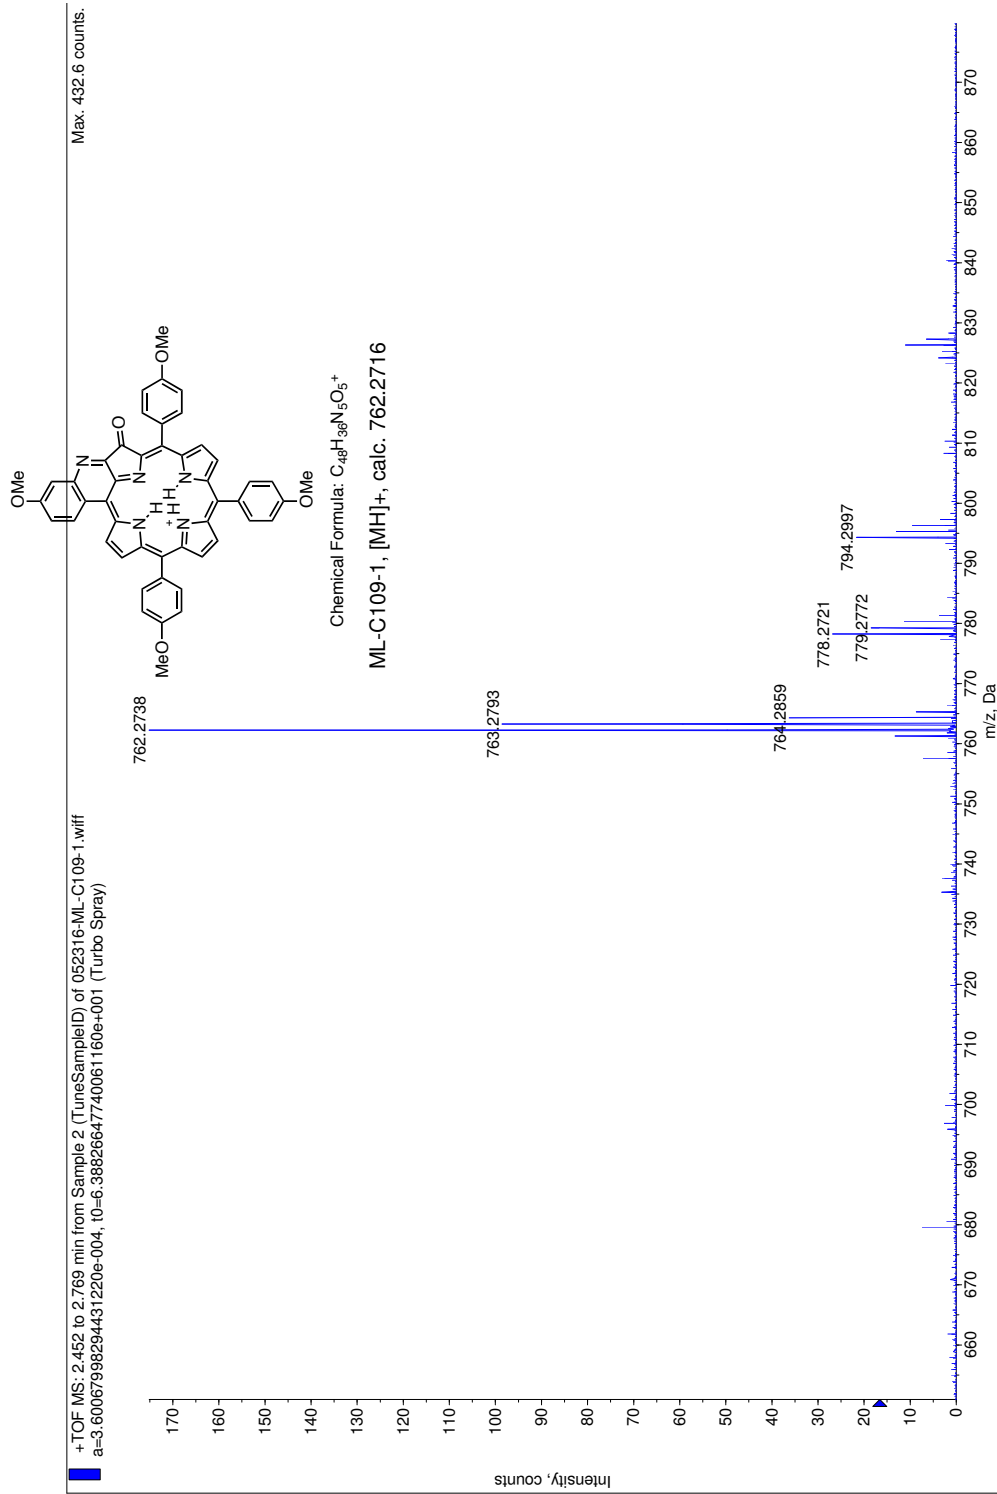

Figure S20. HR-MS ( $ESI^+$ , 100%  $CH_3CN$ , TOF) of **4b**.

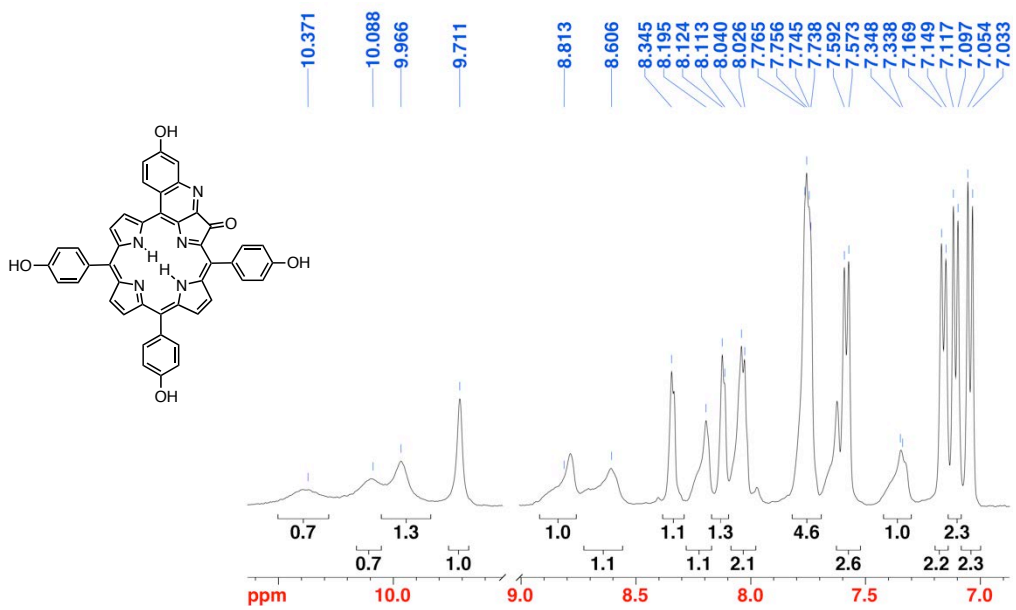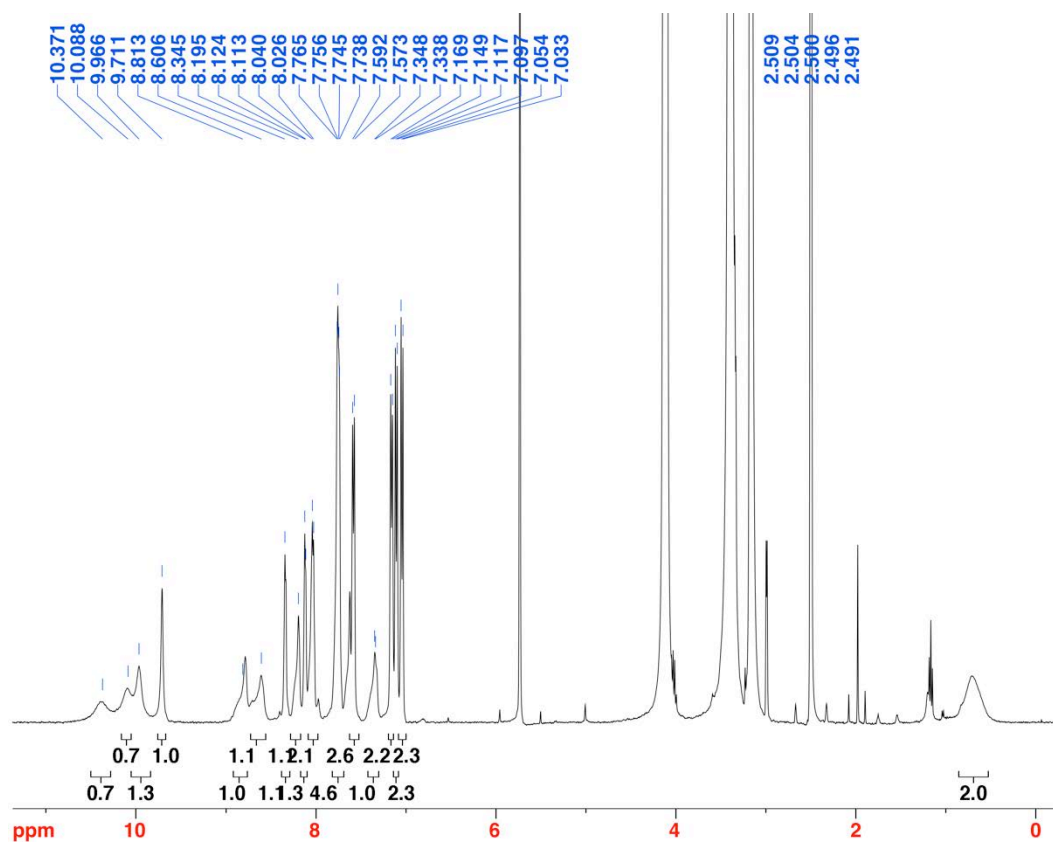

Figure S21. <sup>1</sup>H NMR spectrum (400 MHz, DMSO-d<sub>6</sub>) of 4c.



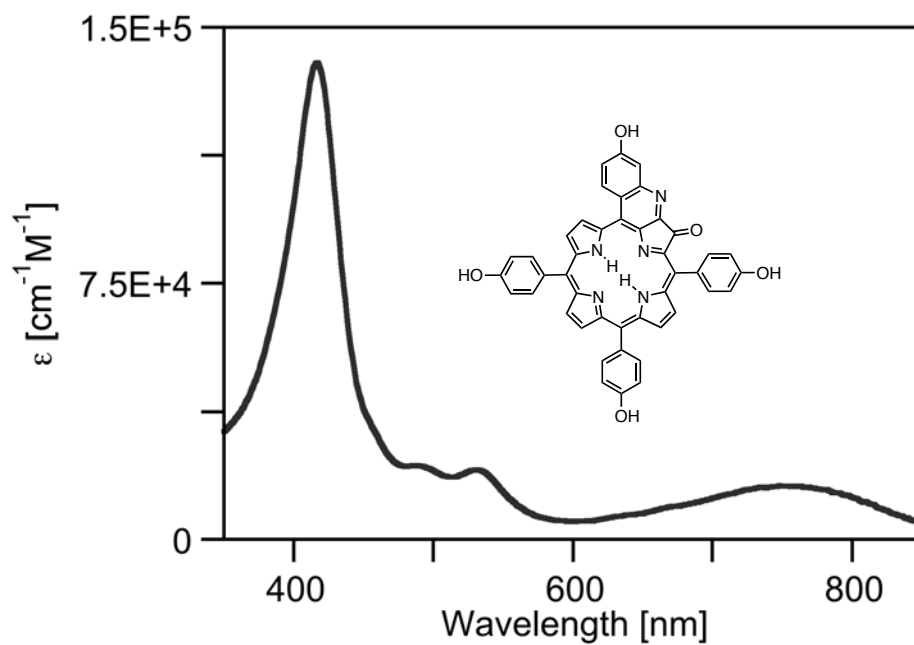

**Figure S23.** UV-vis spectrum (MeOH) of **4c**.

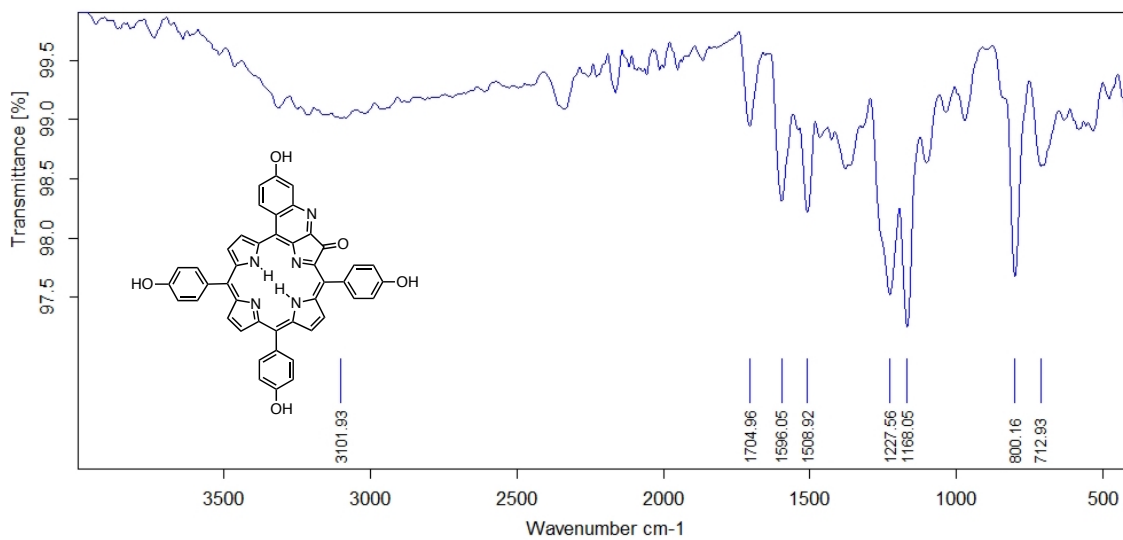

**Figure S24.** FT-IR spectrum (neat, diamond ATR) of **4c**.

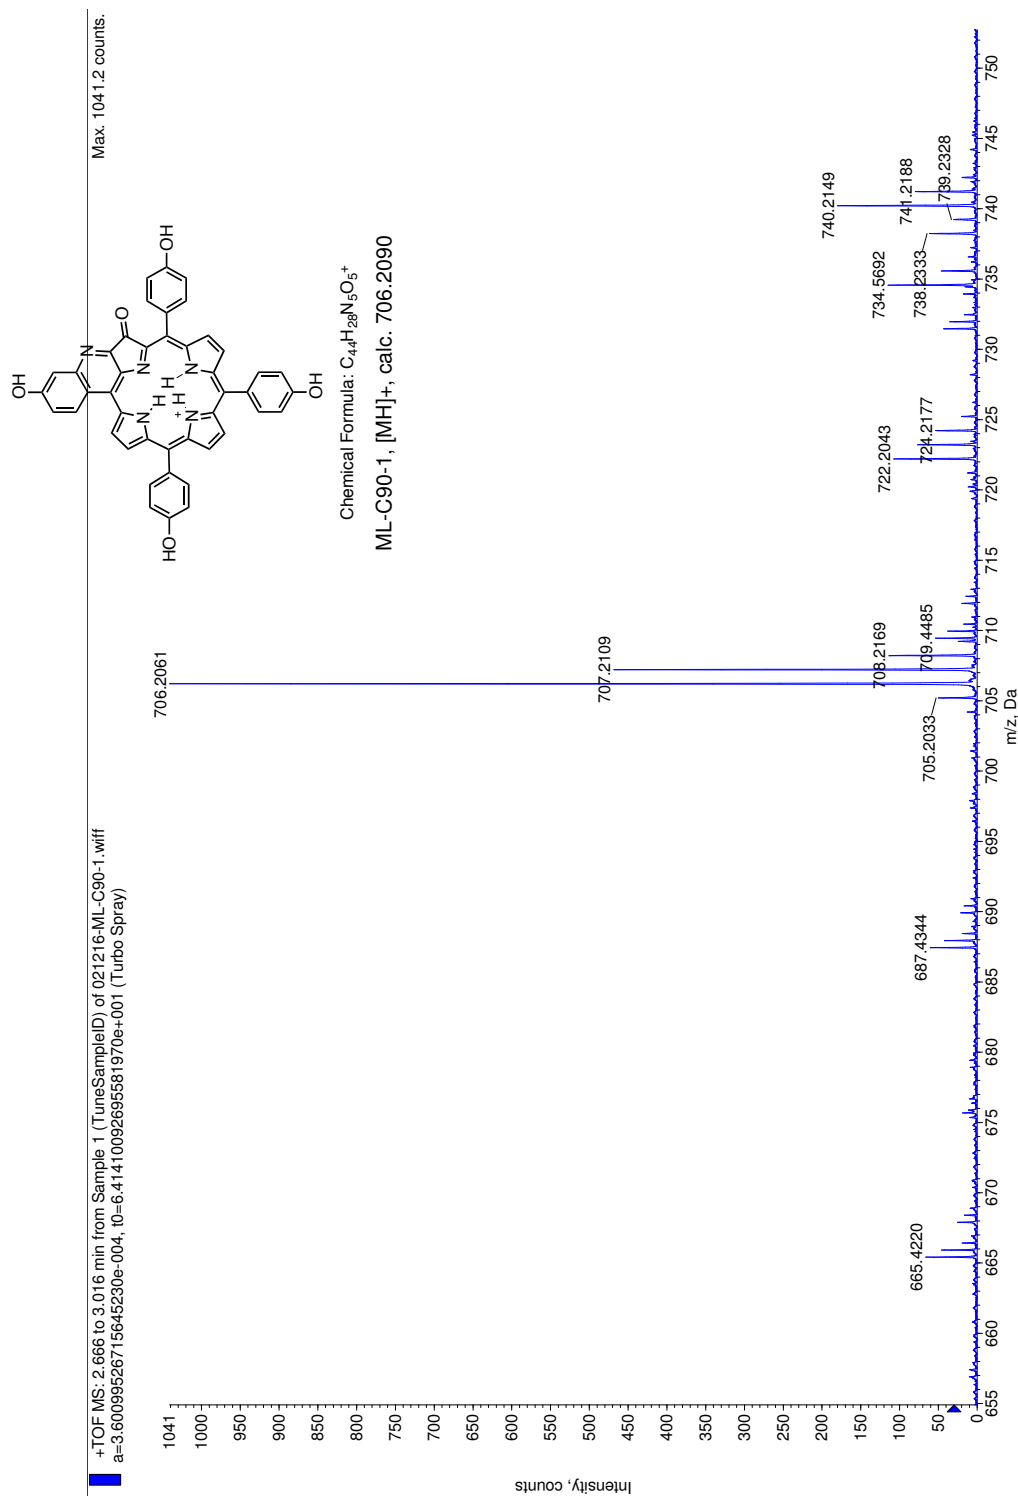

Figure S25. HR-MS ( $ESI^+$ , 100%  $CH_3CN$ , TOF) of **4c**.

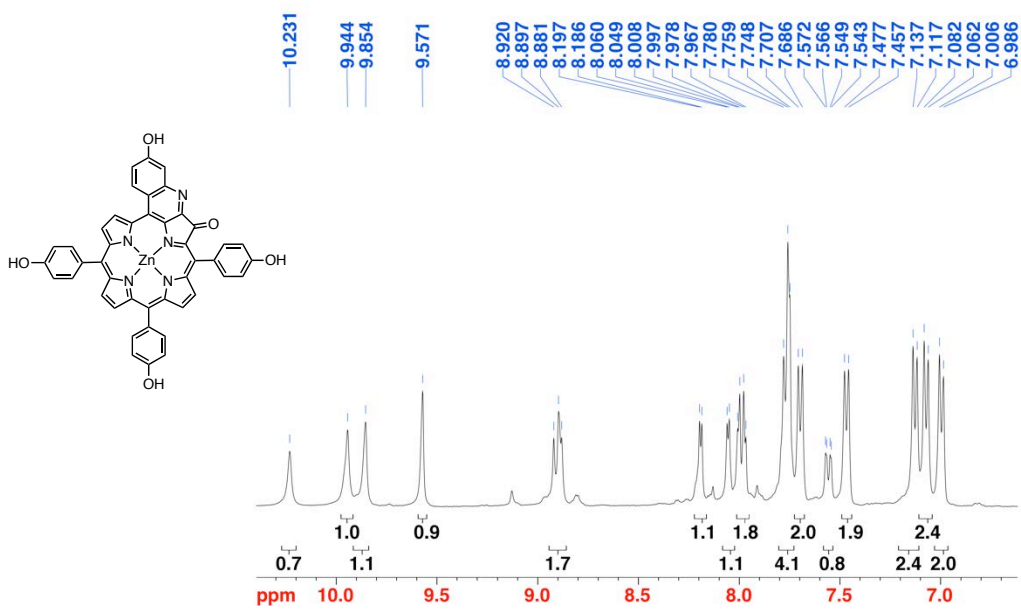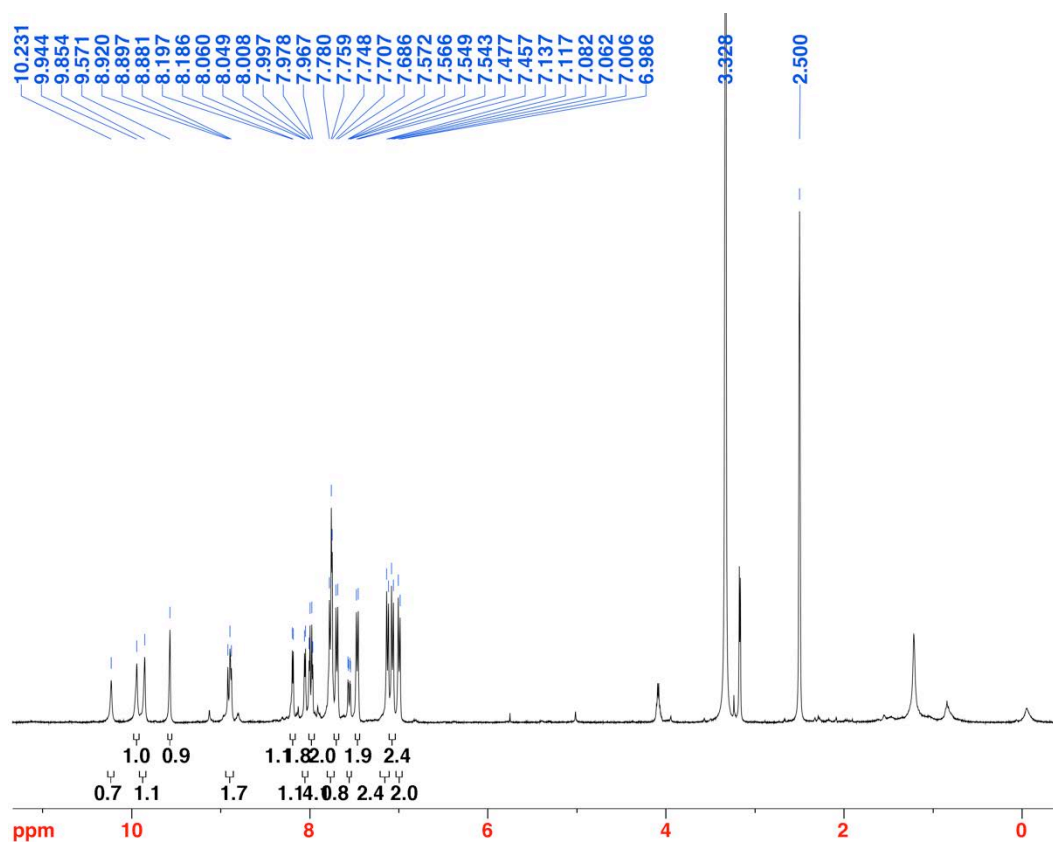

Figure S26. <sup>1</sup>H NMR spectrum (400 MHz, DMSO-d<sub>6</sub>) of **4c<sup>Zn</sup>**.



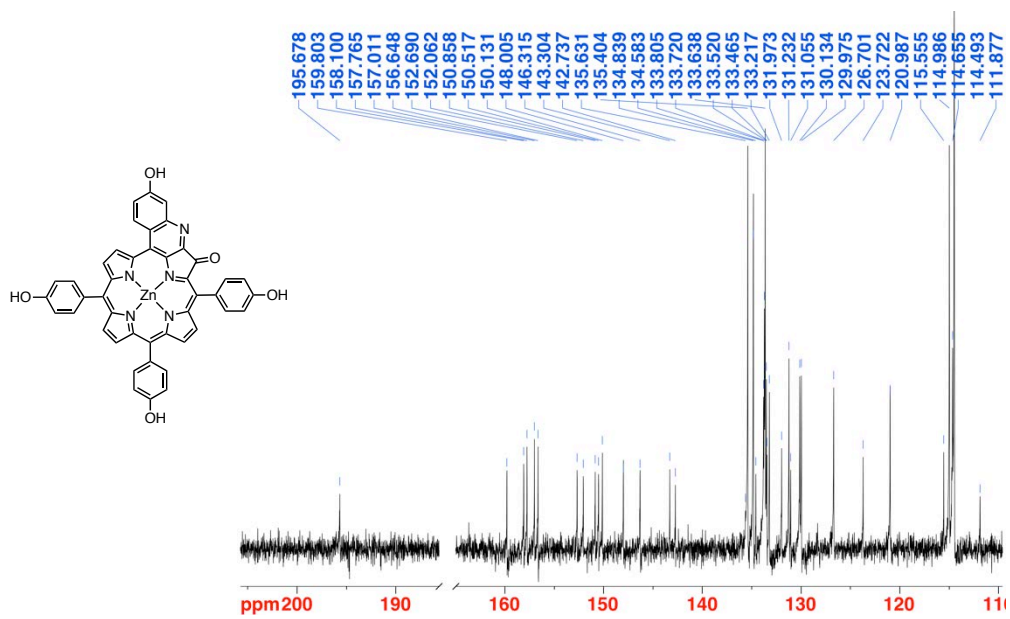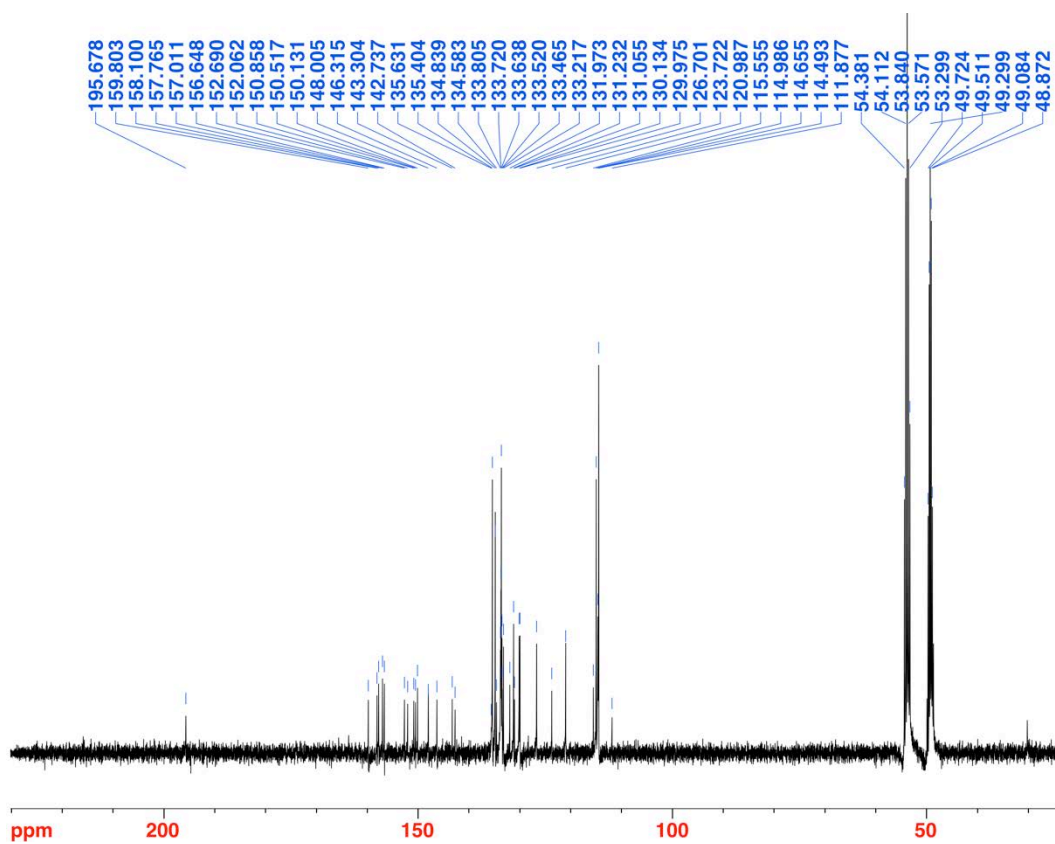

Figure S27.  $^{13}C$  NMR spectrum (100 MHz,  $CD_2Cl_2/10\%$  MeOD) of  $4c^{Zn}$ .

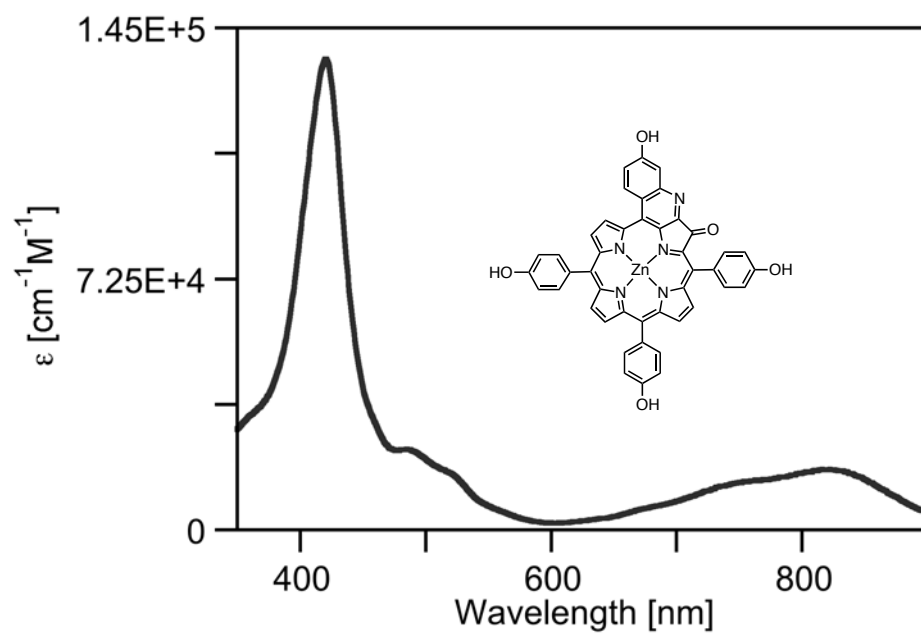

**Figure S28.** UV-vis spectrum (MeOH) of **4c<sup>Zn</sup>**.

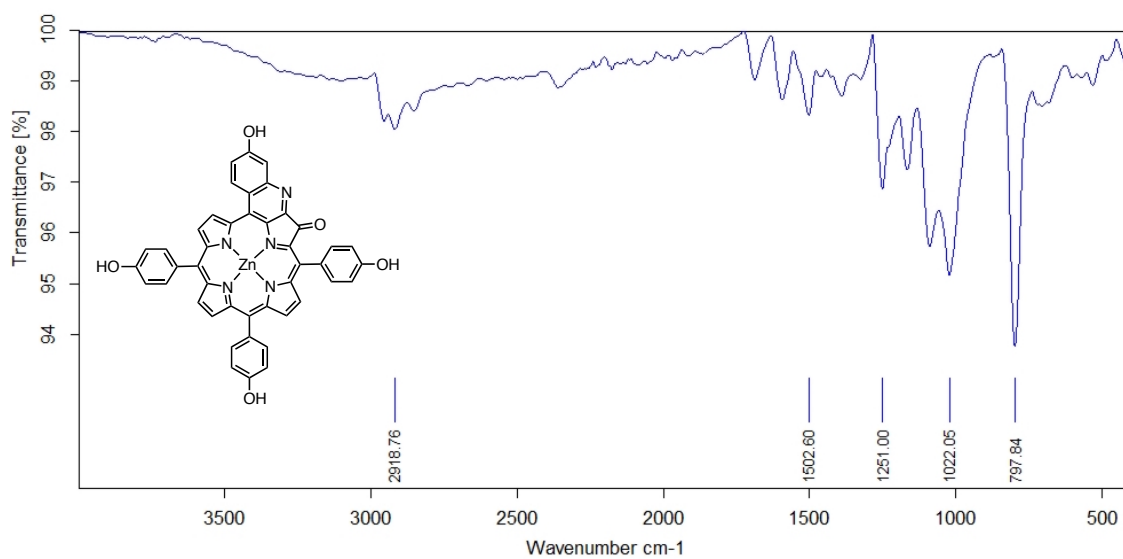

**Figure S29.** FT-IR spectrum (neat, diamond ATR) of **4c<sup>Zn</sup>**.

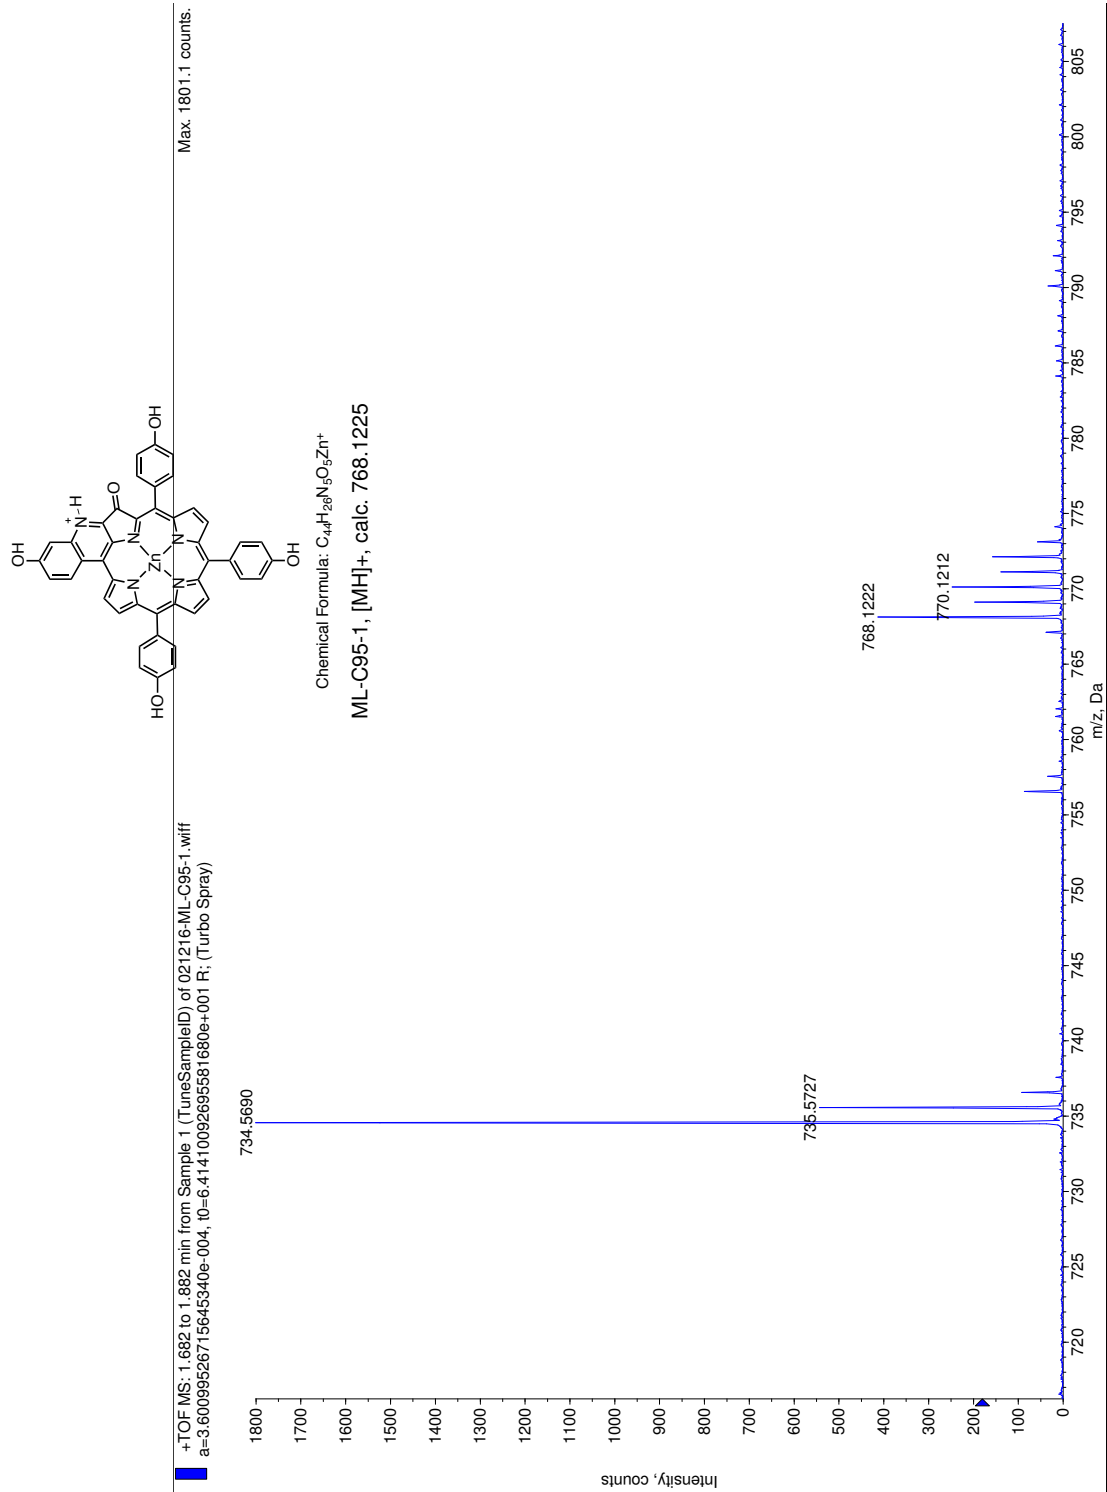

Figure S30. HR-MS (ESI<sup>+</sup>, 100% CH<sub>3</sub>CN, TOF) of **4c**<sup>Zn</sup>.

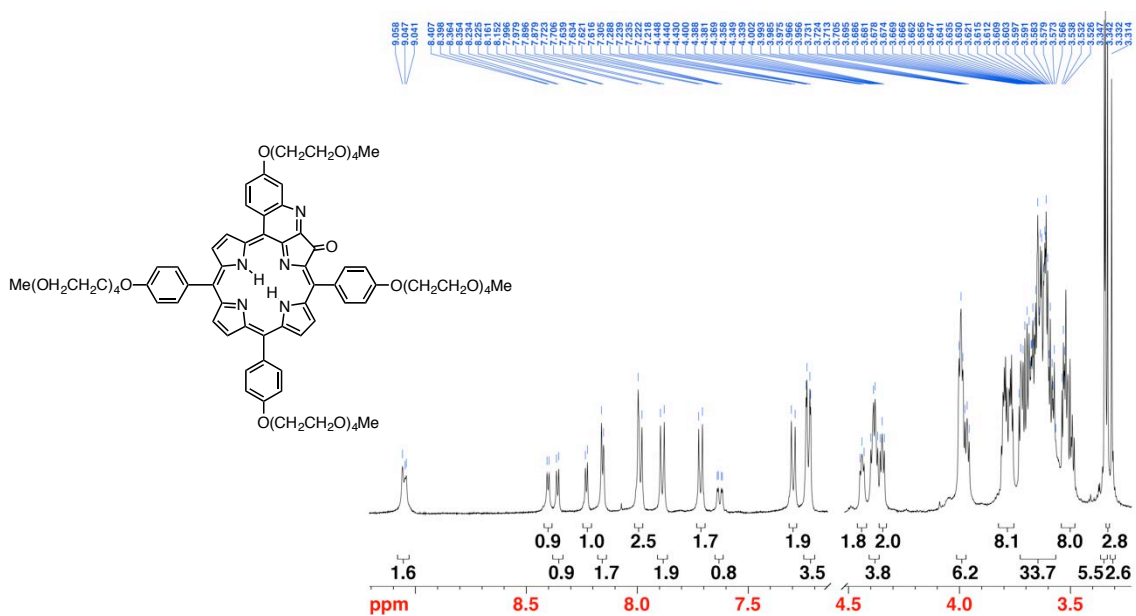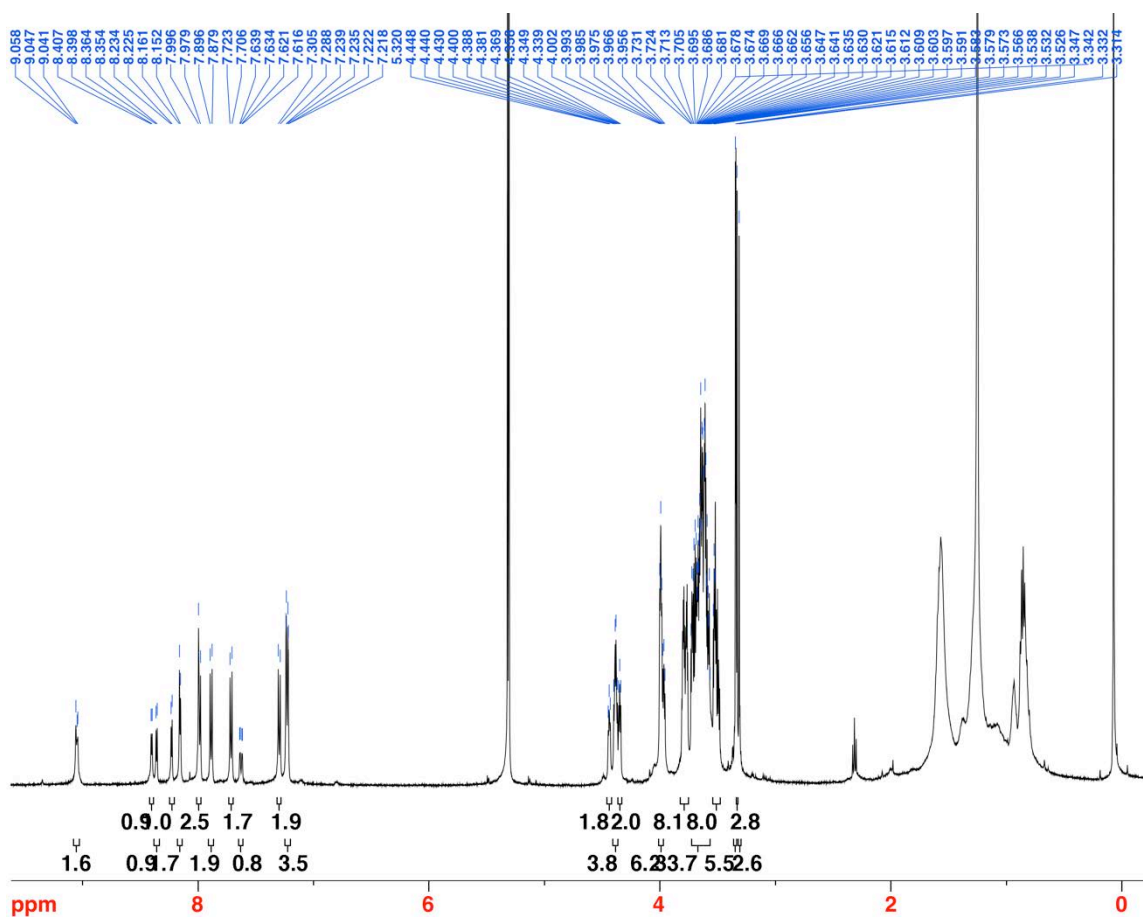

Figure S31. <sup>1</sup>H NMR spectrum (500 MHz, CD<sub>2</sub>Cl<sub>2</sub>) of 4d.

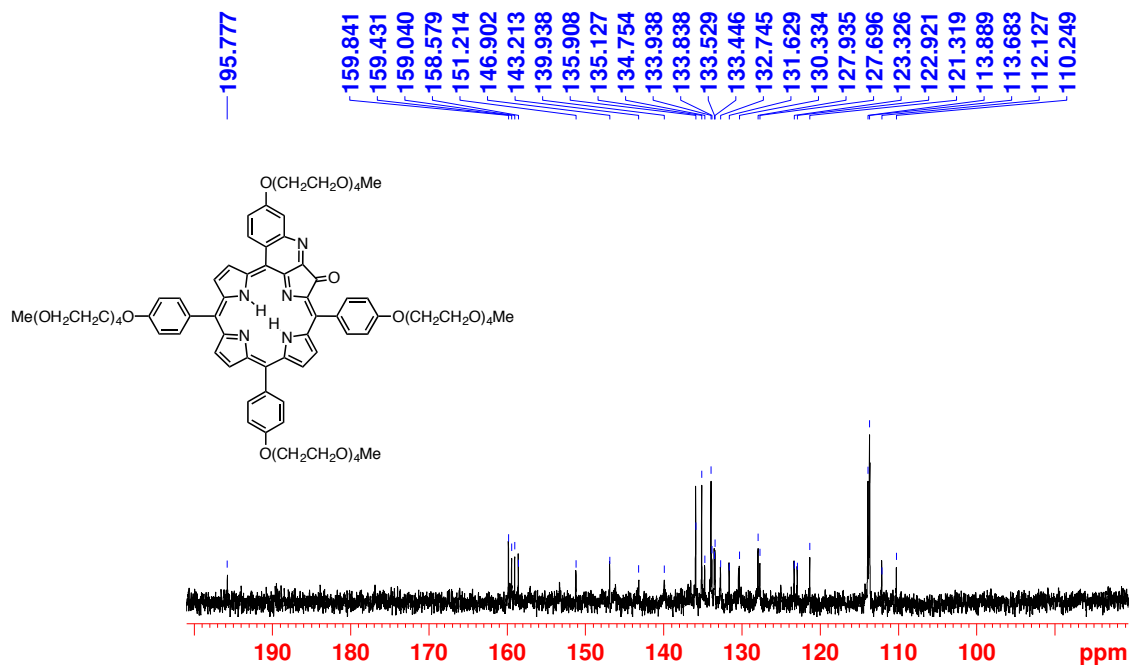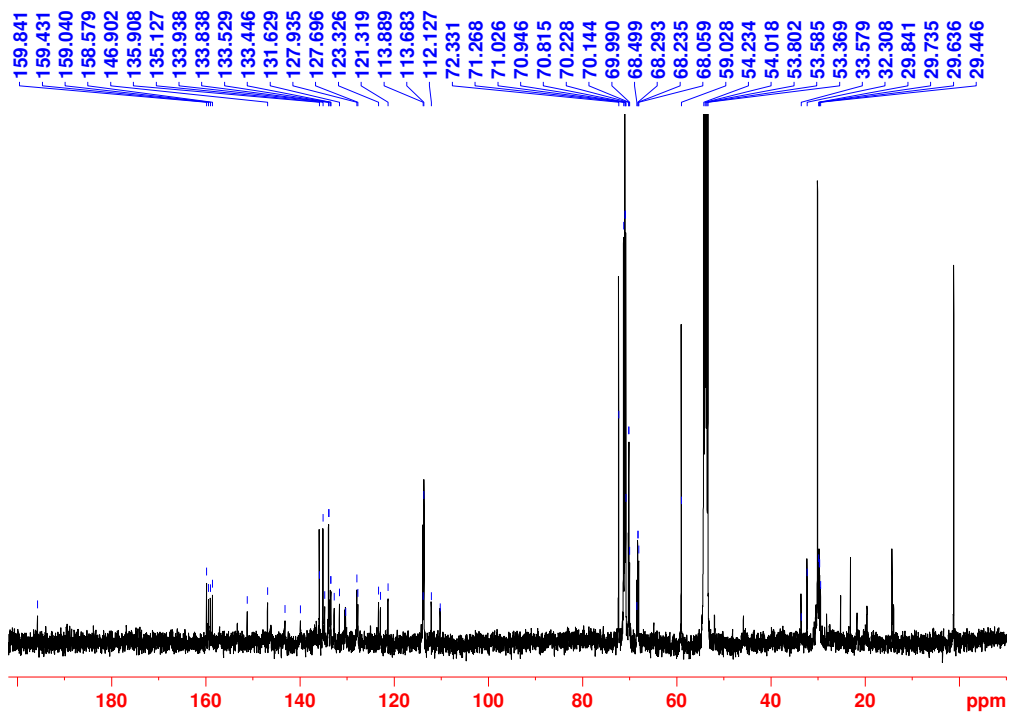

Figure S32. <sup>13</sup>C NMR spectrum (125 MHz, CD<sub>2</sub>Cl<sub>2</sub>) of **4d**.

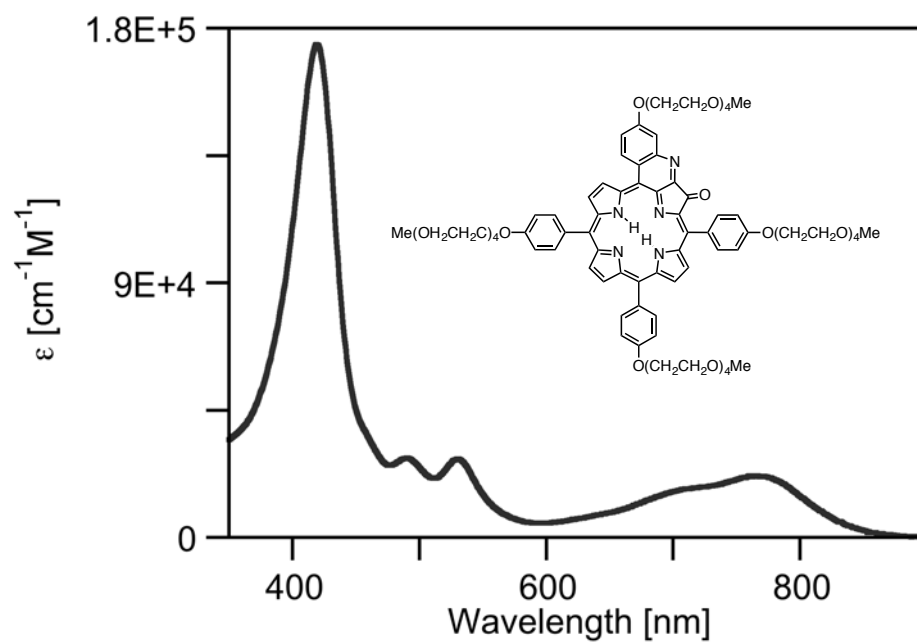

**Figure S33.** UV-vis spectrum ( $\text{CH}_2\text{Cl}_2$ ) of **4d**.

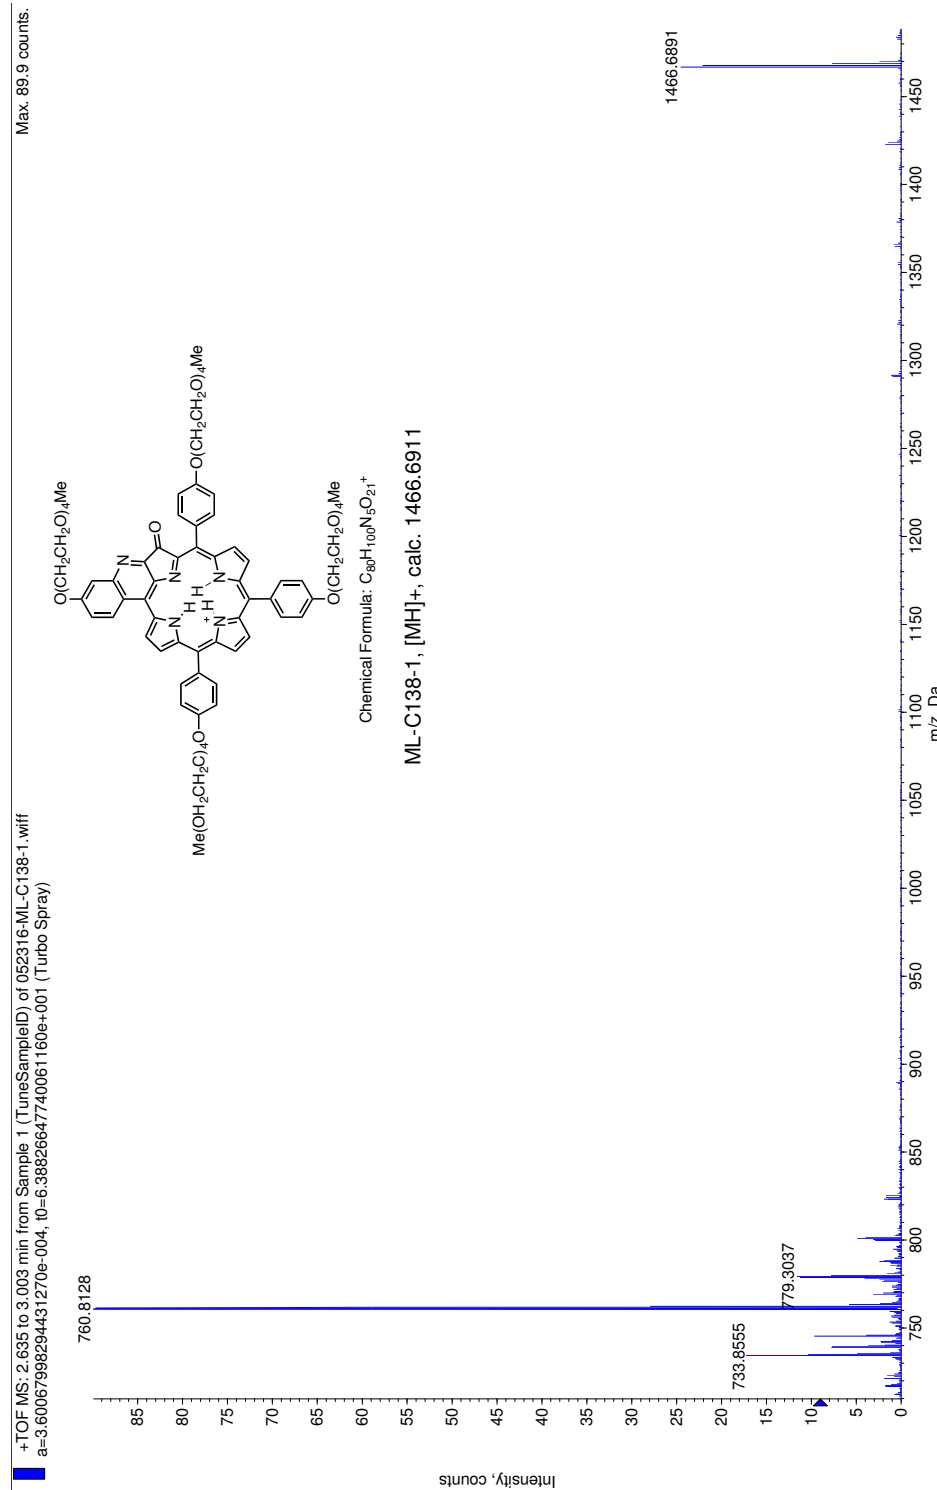

**Figure S34.** HR-MS (ESI<sup>+</sup>, 100% CH<sub>3</sub>CN, TOF) of **4d**.

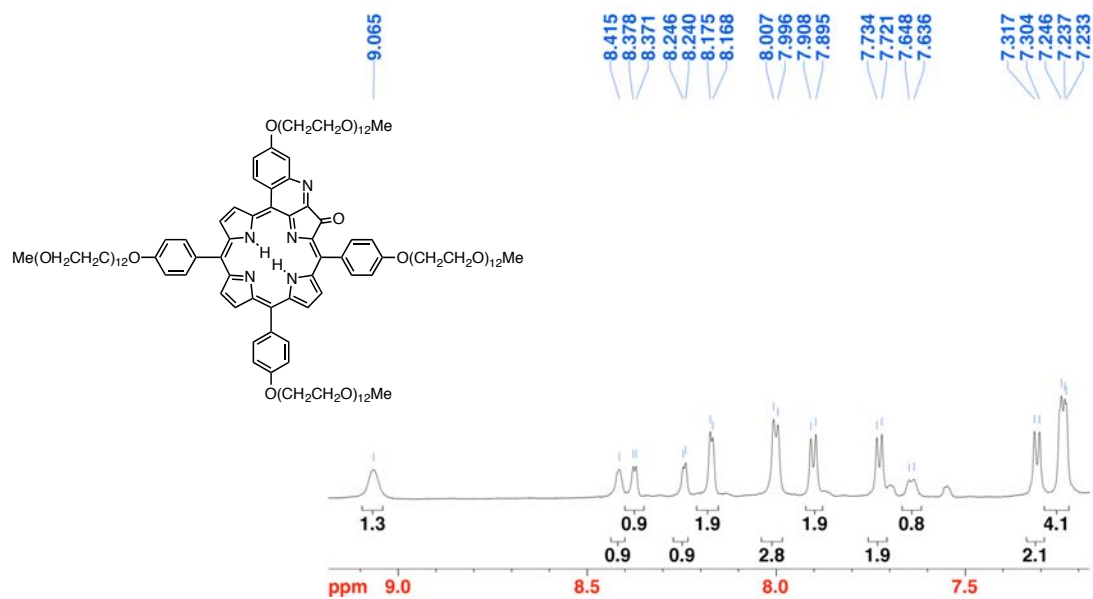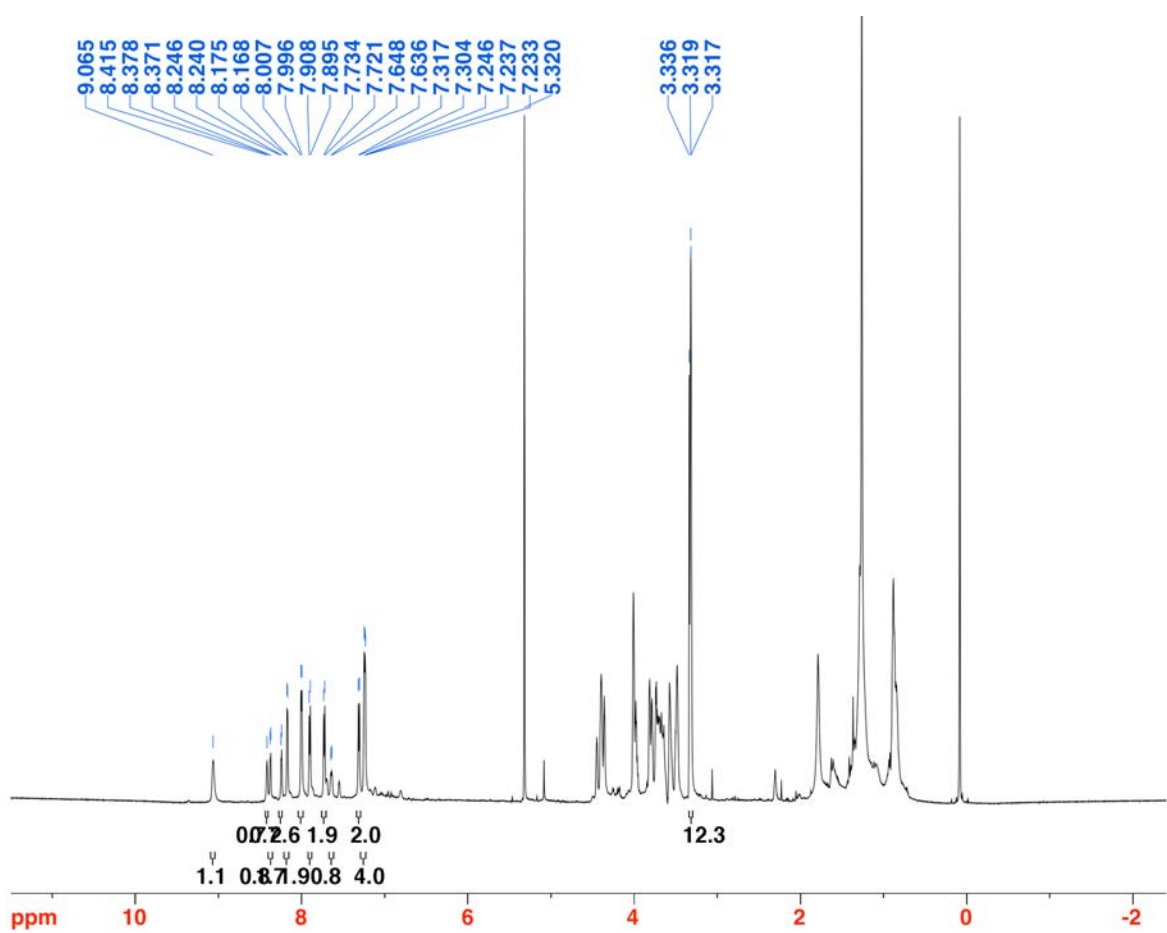

**Figure S35.**  $^1\text{H}$  NMR spectrum (400 MHz,  $\text{CD}_2\text{Cl}_2$ ) of **4e**.



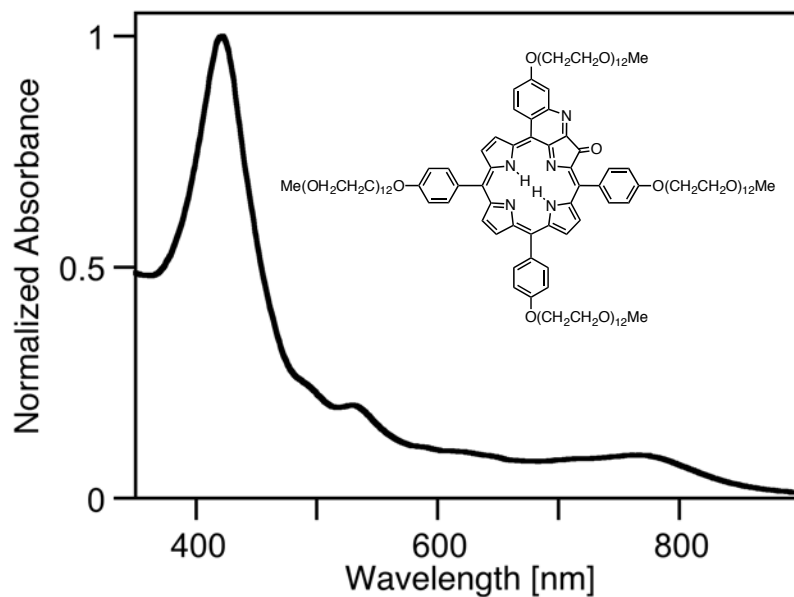

**Figure S36.** UV-vis spectrum ( $\text{H}_2\text{O}$ ) of **4e**.

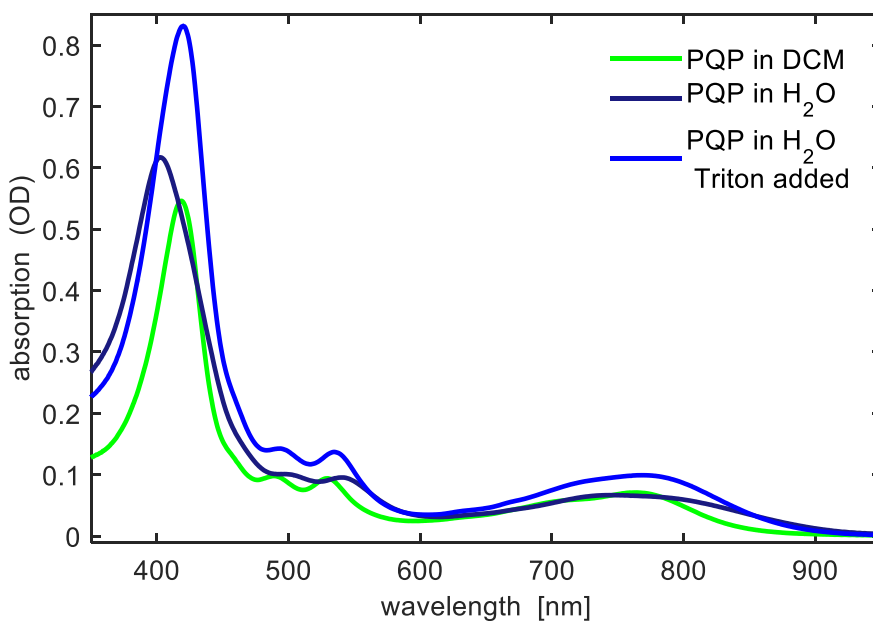

**Figure S37.** Absorption spectra of **4e** (PQP) in  $\text{CH}_2\text{Cl}_2$ ,  $\text{H}_2\text{O}$  and  $\text{H}_2\text{O}$ -Triton-X solutions. The change of the absorption spectrum of **4e** in  $\text{H}_2\text{O}$  after adding triton indicates that **4e** is somewhat aggregated in pure aqueous solution.

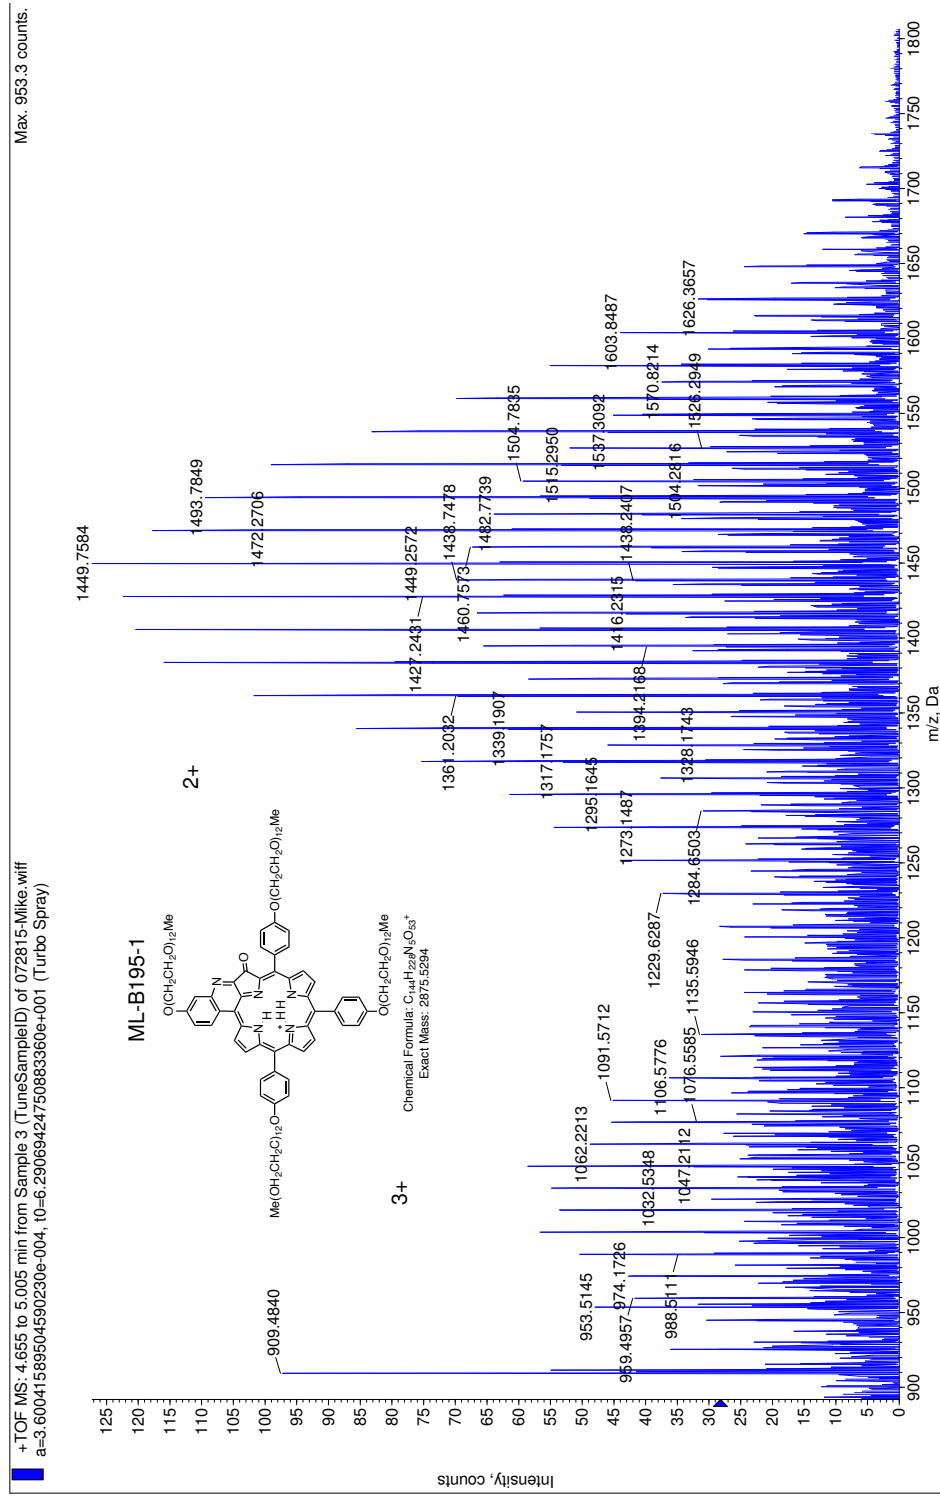

Figure S38. HR-MS (ESI<sup>+</sup>, 100% CH<sub>3</sub>CN, TOF) of 4e.

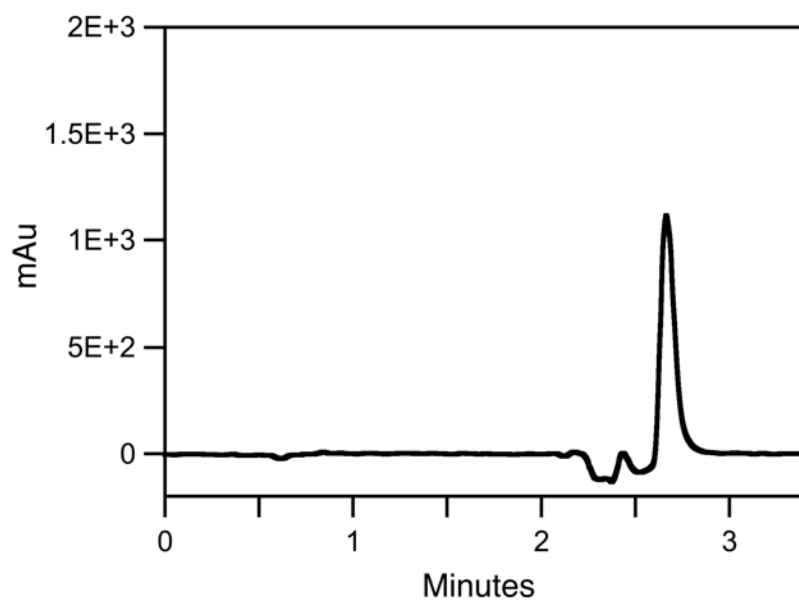

**Figure S39.** HPLC trace, UV-vis detector, of **4e** (silica, mobile phase: CH<sub>2</sub>Cl<sub>2</sub>/10% MeOH).

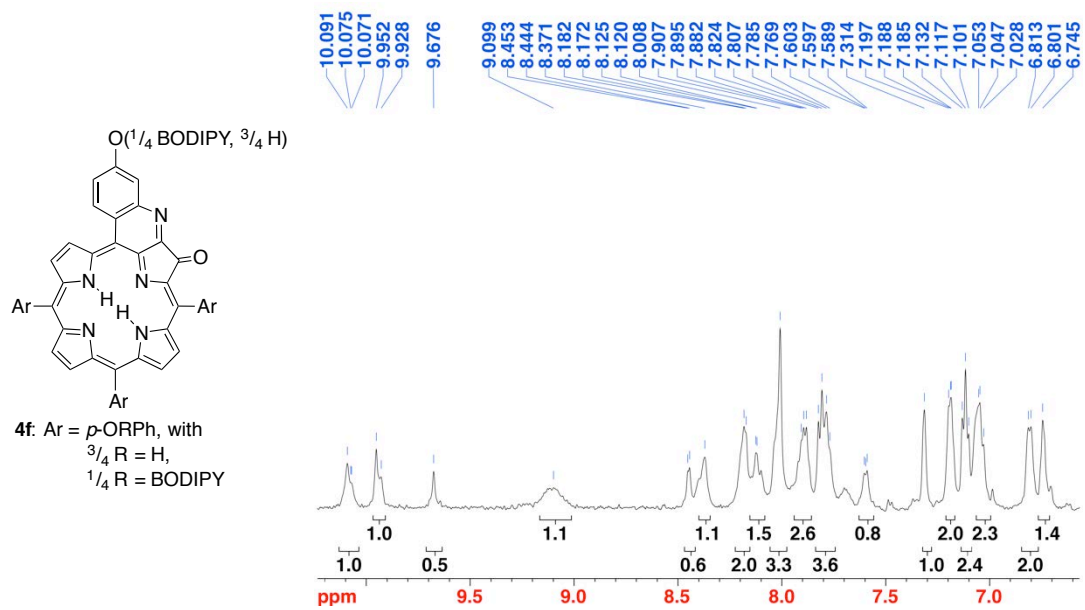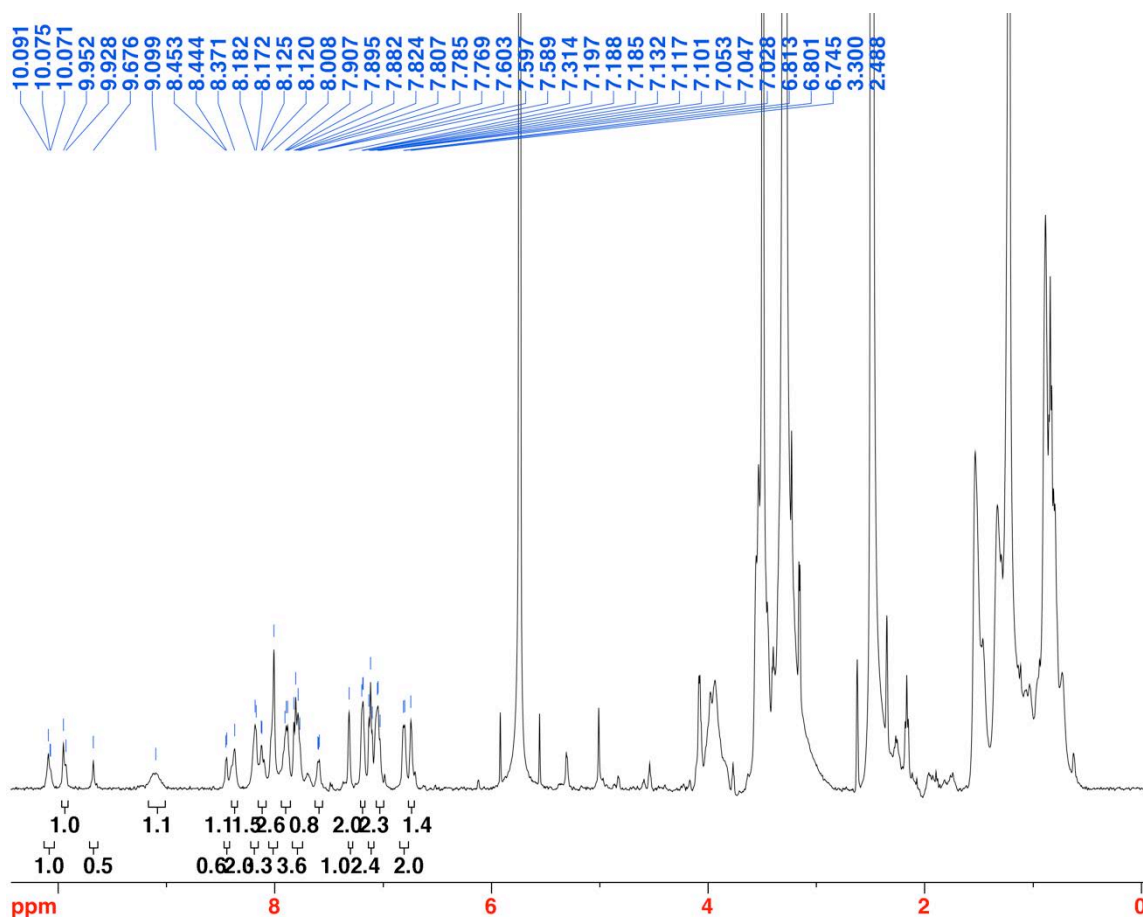

Figure S40. <sup>1</sup>H NMR spectrum (500 MHz, DMSO-d<sub>6</sub>) of **4f**.

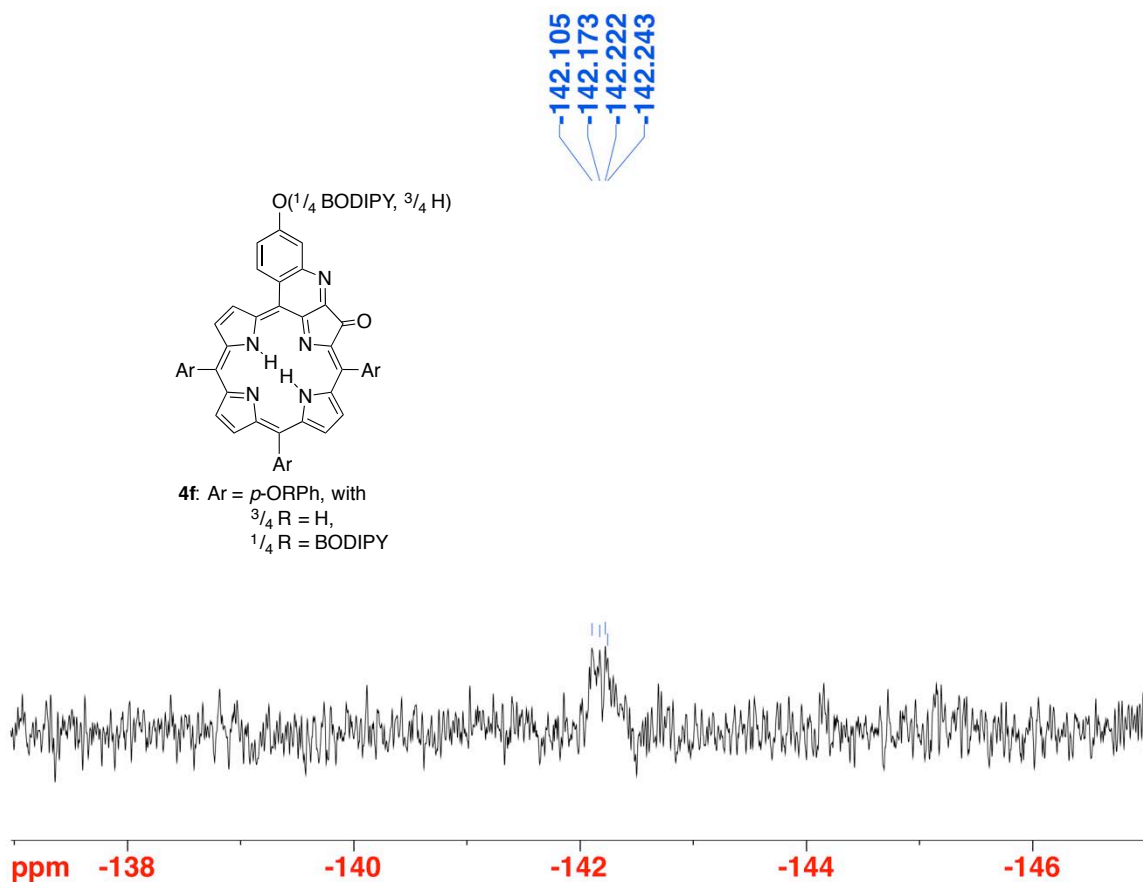

**Figure S41.**  $^{19}\text{F}$  NMR spectrum (470 MHz, DMSO- $d_6$ ) of **4f**.

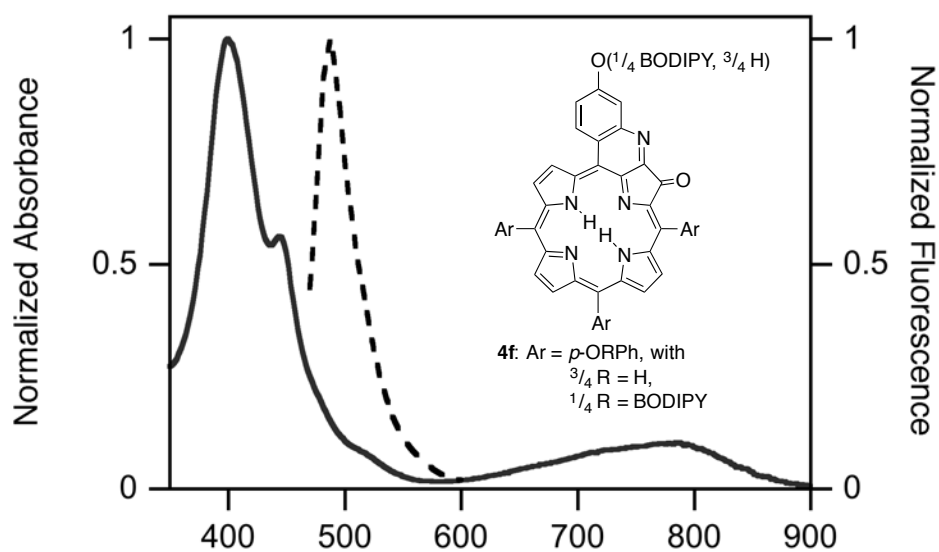

**Figure S42.** UV-vis and Fluorescence emission spectrum (MeOH,  $\lambda_{\text{excitation}} = 441 \text{ nm}$ ) of **4f**.

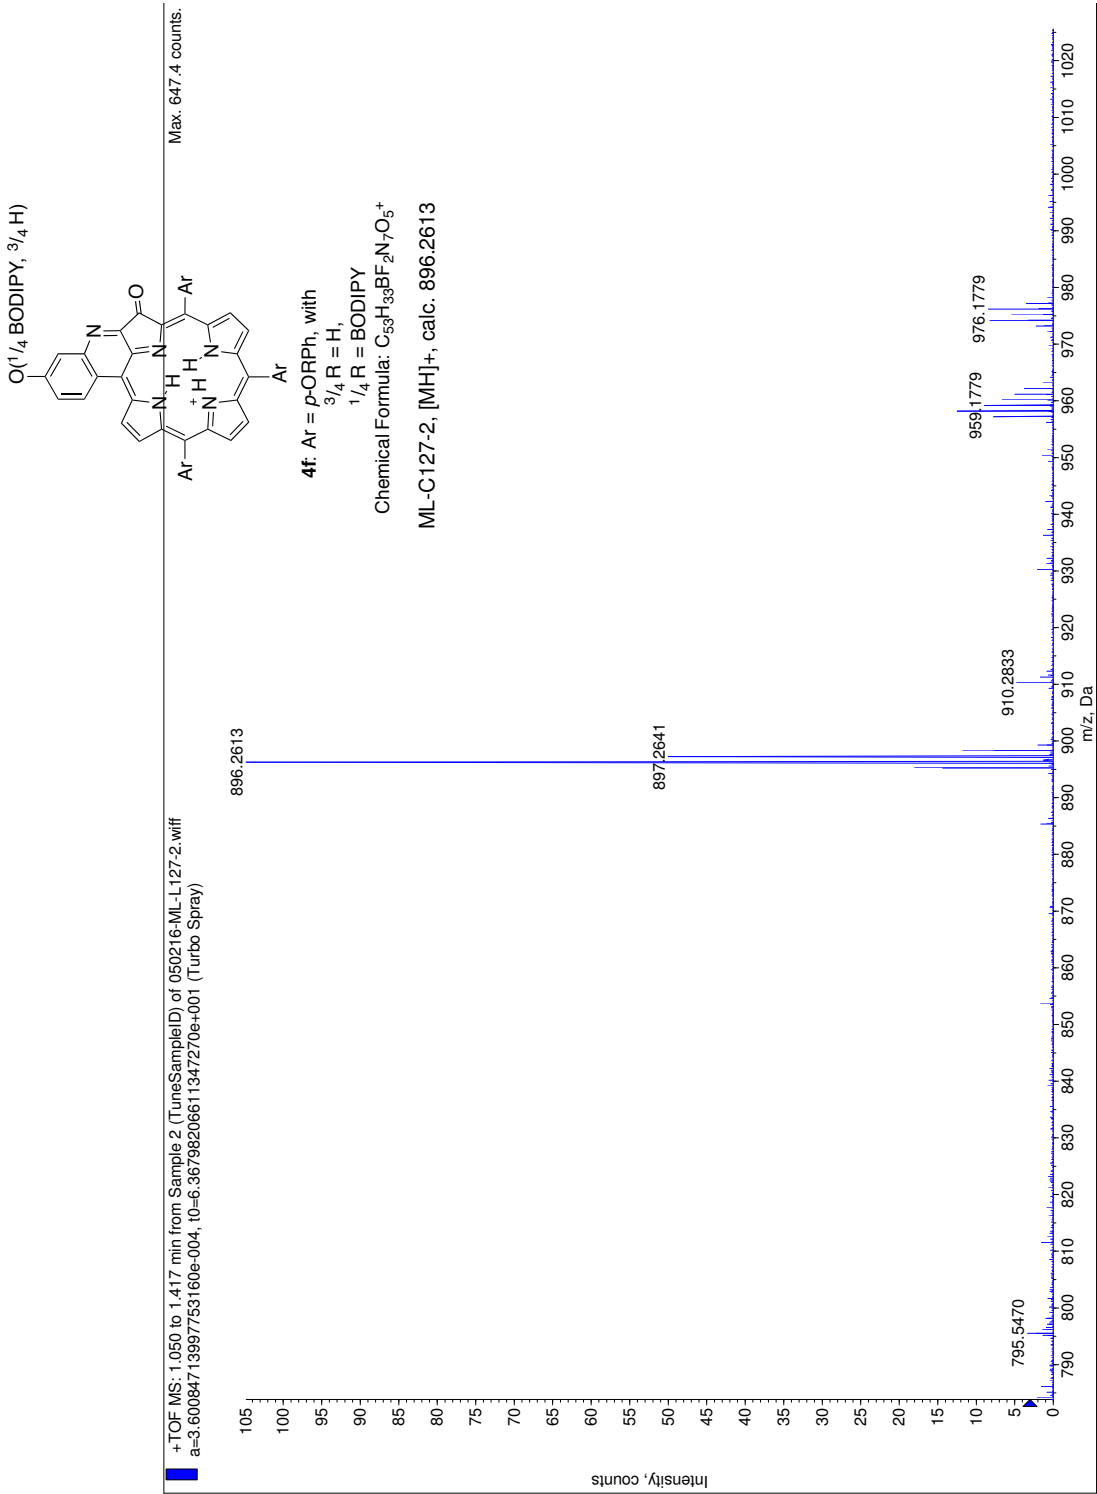

Figure S43. HR-MS (ESI+, 100% CH<sub>3</sub>CN, TOF) of 4f.

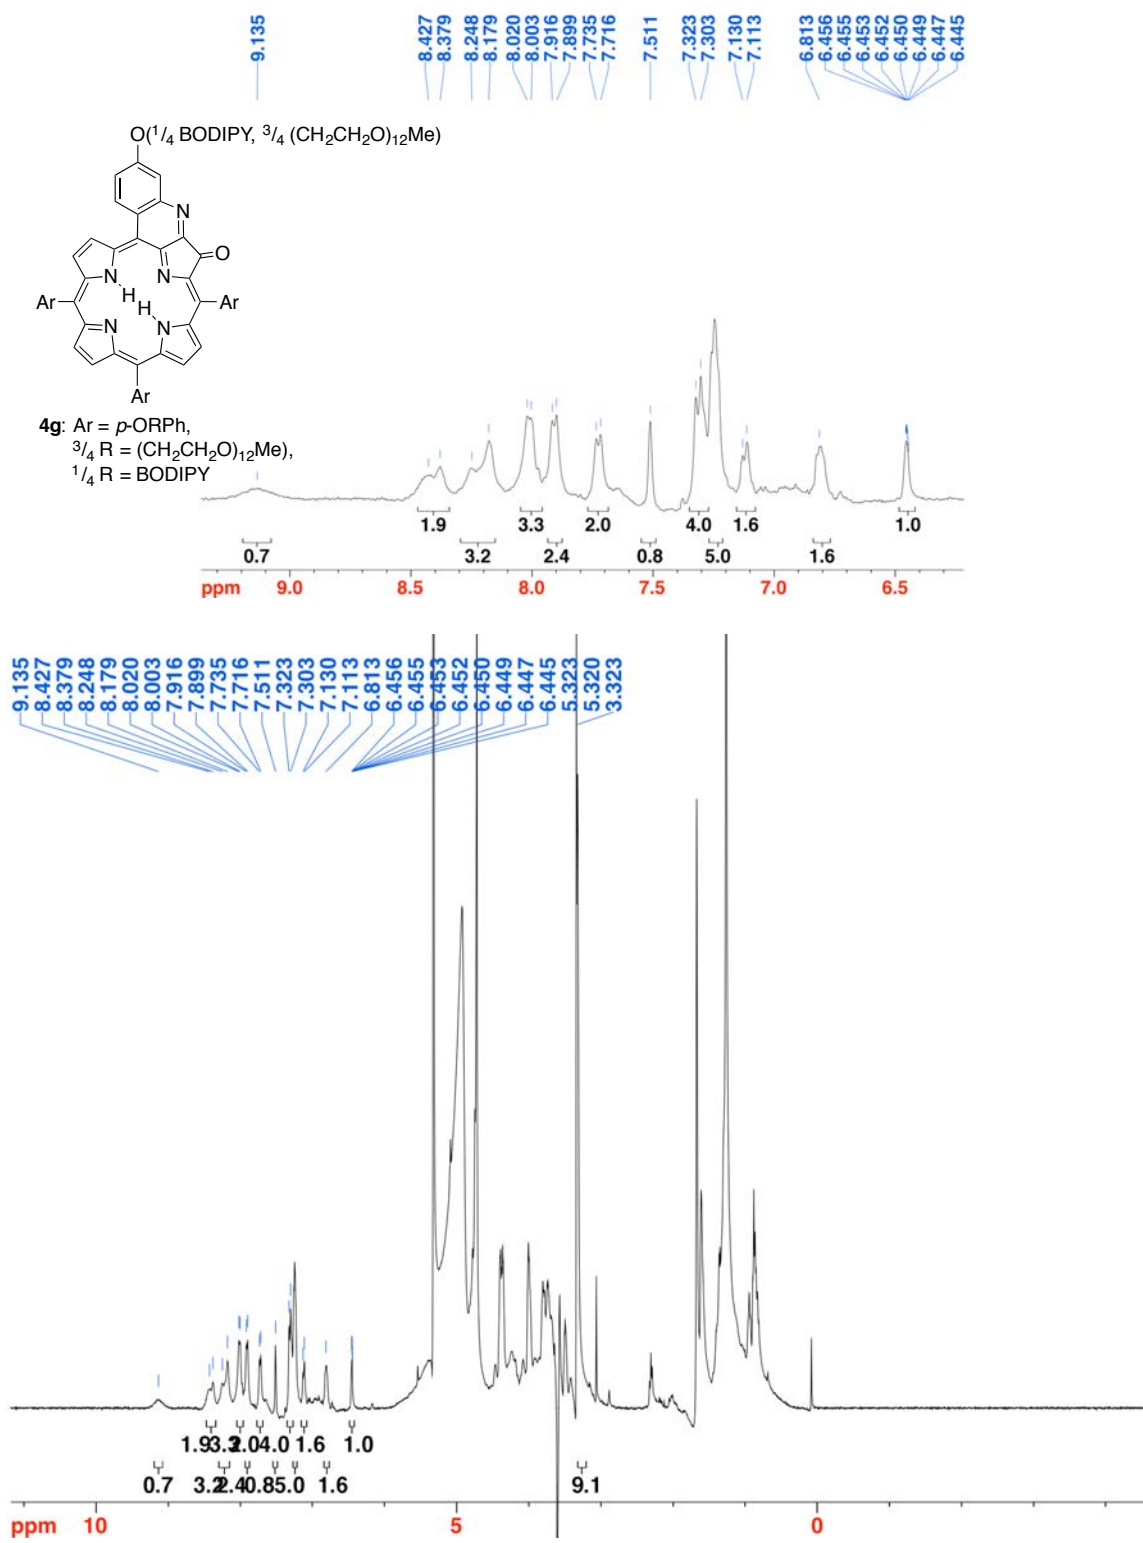

Figure S44. <sup>1</sup>H NMR spectrum (400 MHz, CD<sub>2</sub>Cl<sub>2</sub>, pre-saturated at 3.6 ppm) of **4g**.

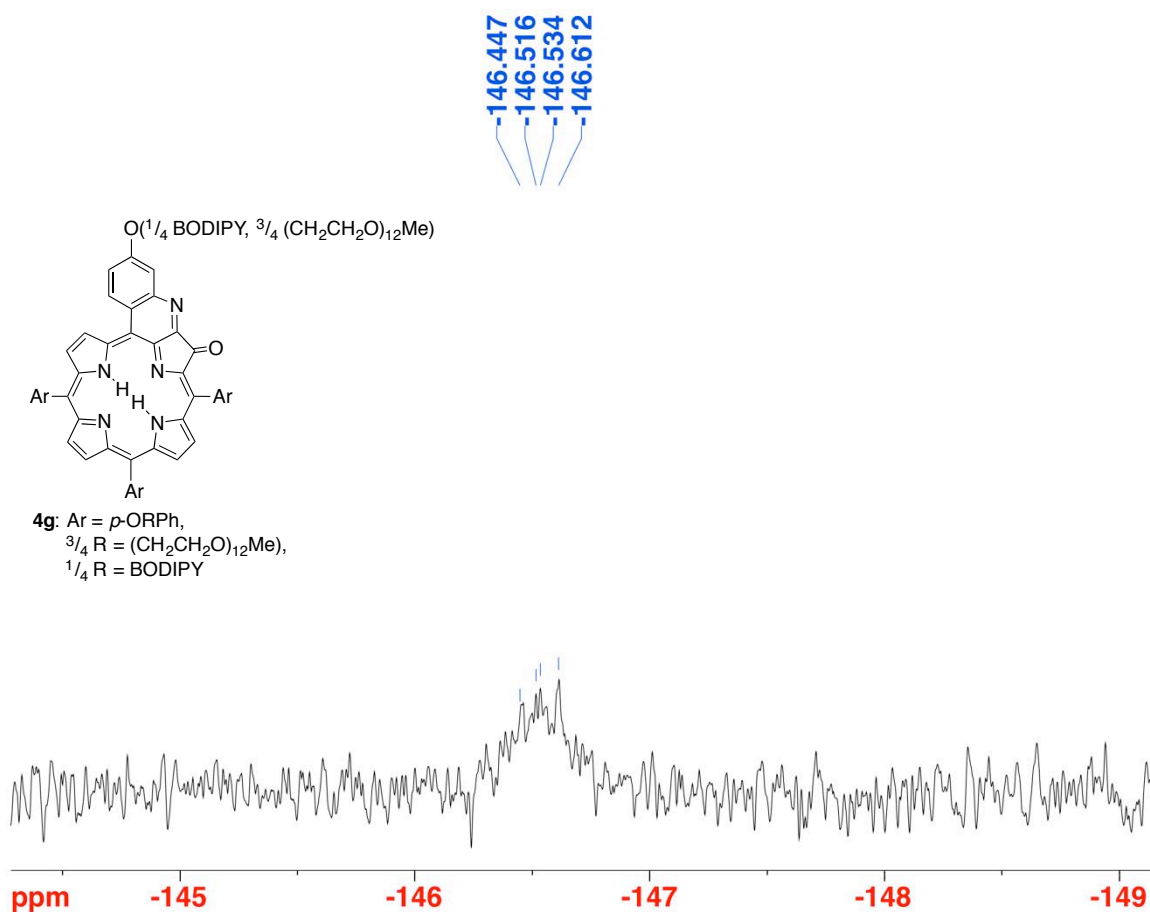

**Figure S45.** <sup>19</sup>F NMR spectrum (376 MHz, CD<sub>2</sub>Cl<sub>2</sub>) of **4g**.

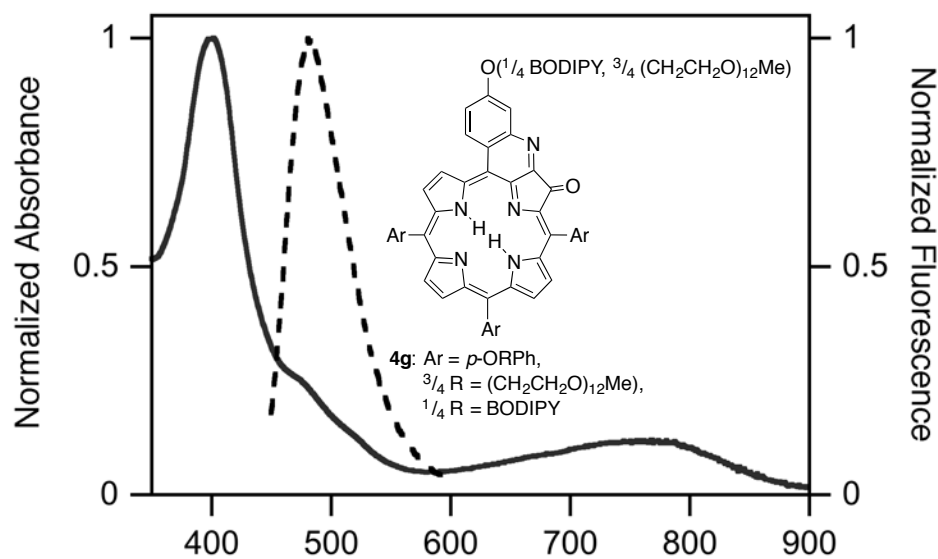

**Figure S46.** UV-vis and Fluorescence emission spectrum (MeOH,  $\lambda_{\text{excitation}} = 441$  nm) of **4g**.



D:\Data\Nonika\ML\_090916\ML-C140-2 in DHBA\0\_CS\1\1\SRef

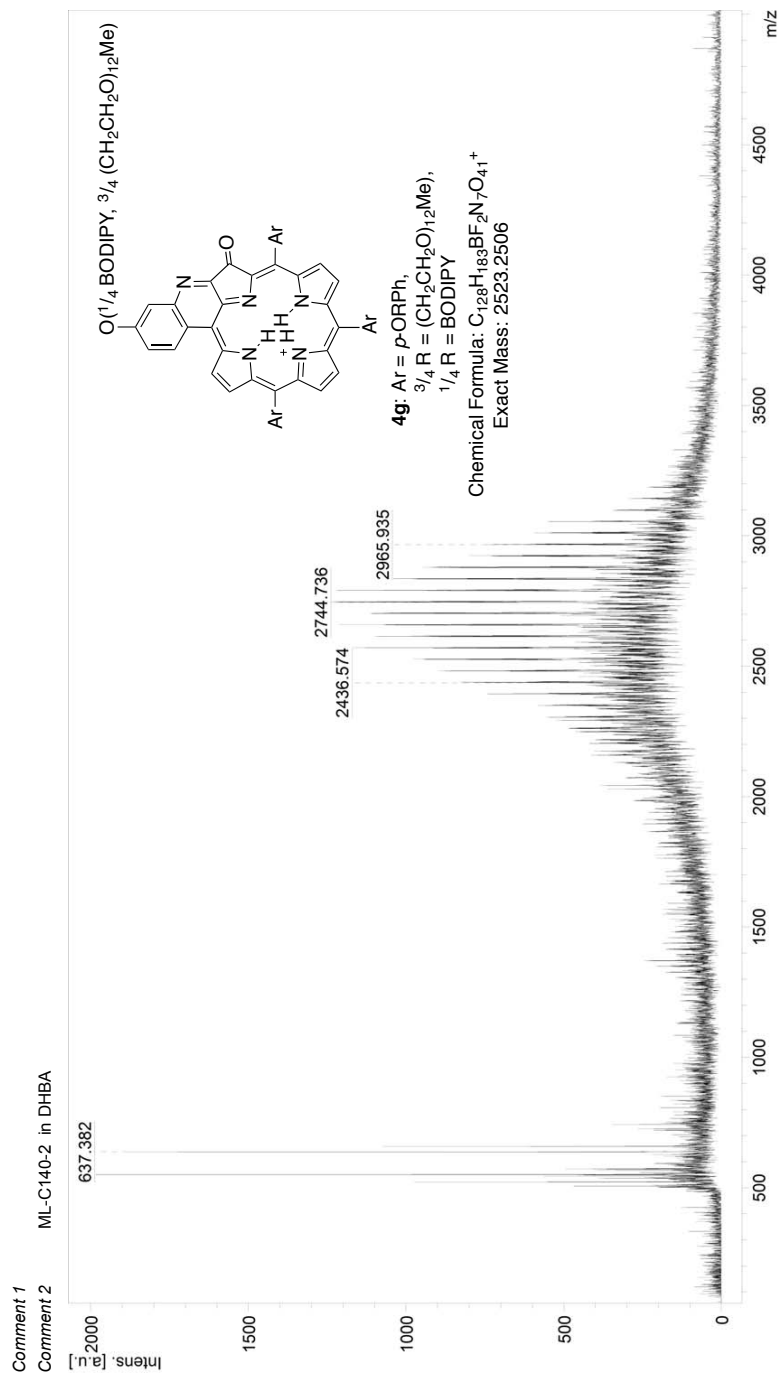

printed: 9/9/2016 11:30:44

**Figure S47.** MALDI-TOF spectrum (100% DHBA) of **4g**.

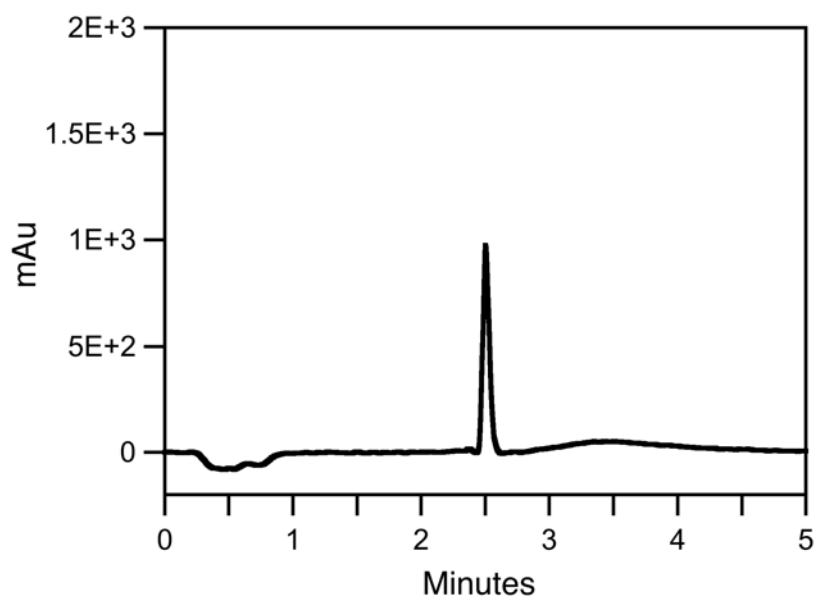

**Figure S48.** HPLC trace, UV-vis detector, of **4g** (silica, mobile phase: CH<sub>2</sub>Cl<sub>2</sub>/5% MeOH).

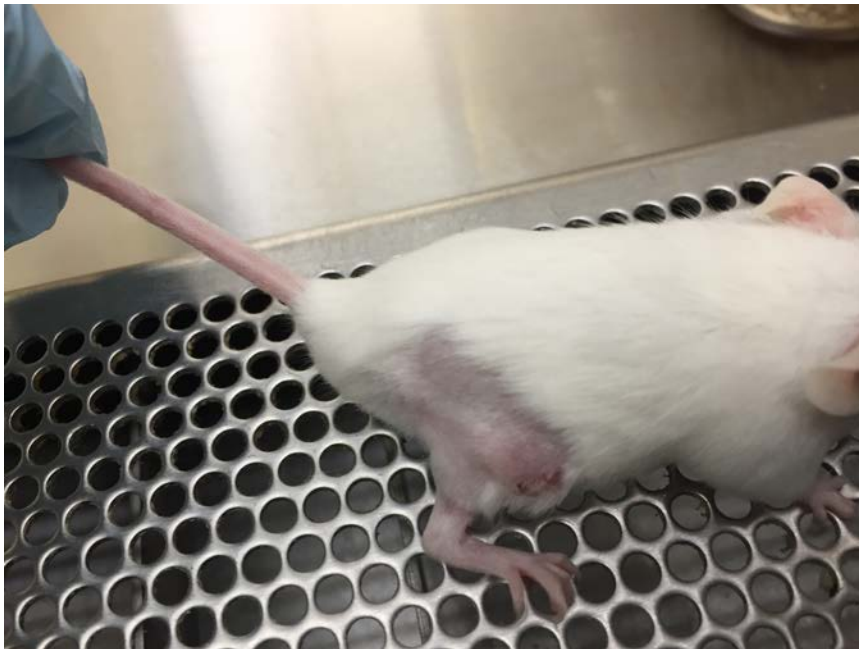

**Figure S49.** A mouse tumor before injection of **4e**.

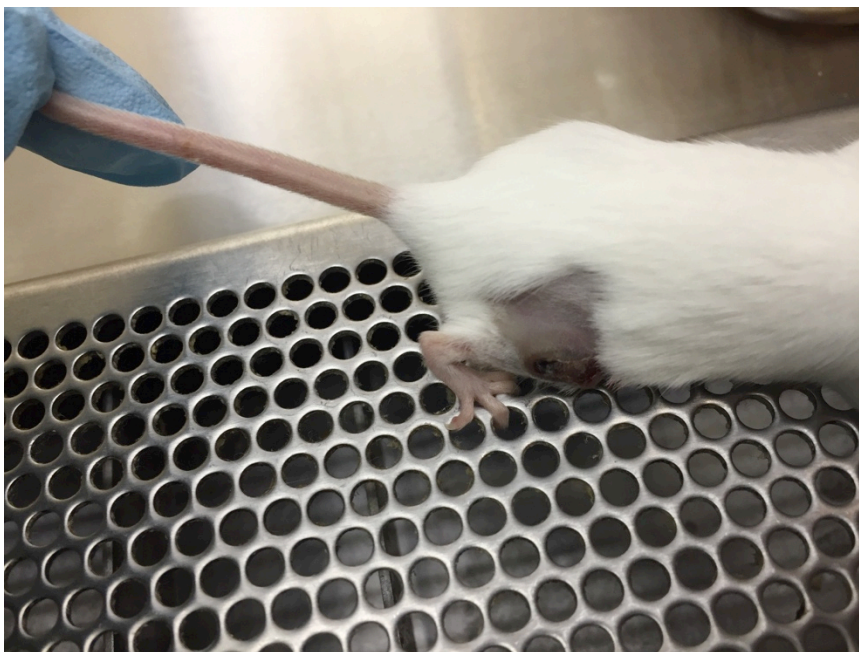

**Figure S50.** A mouse tumor 48 h after injection of 100  $\mu\text{L}$  of a 33 mM solution of **4e** in PBS, showing the dark brown-stained tumor site.

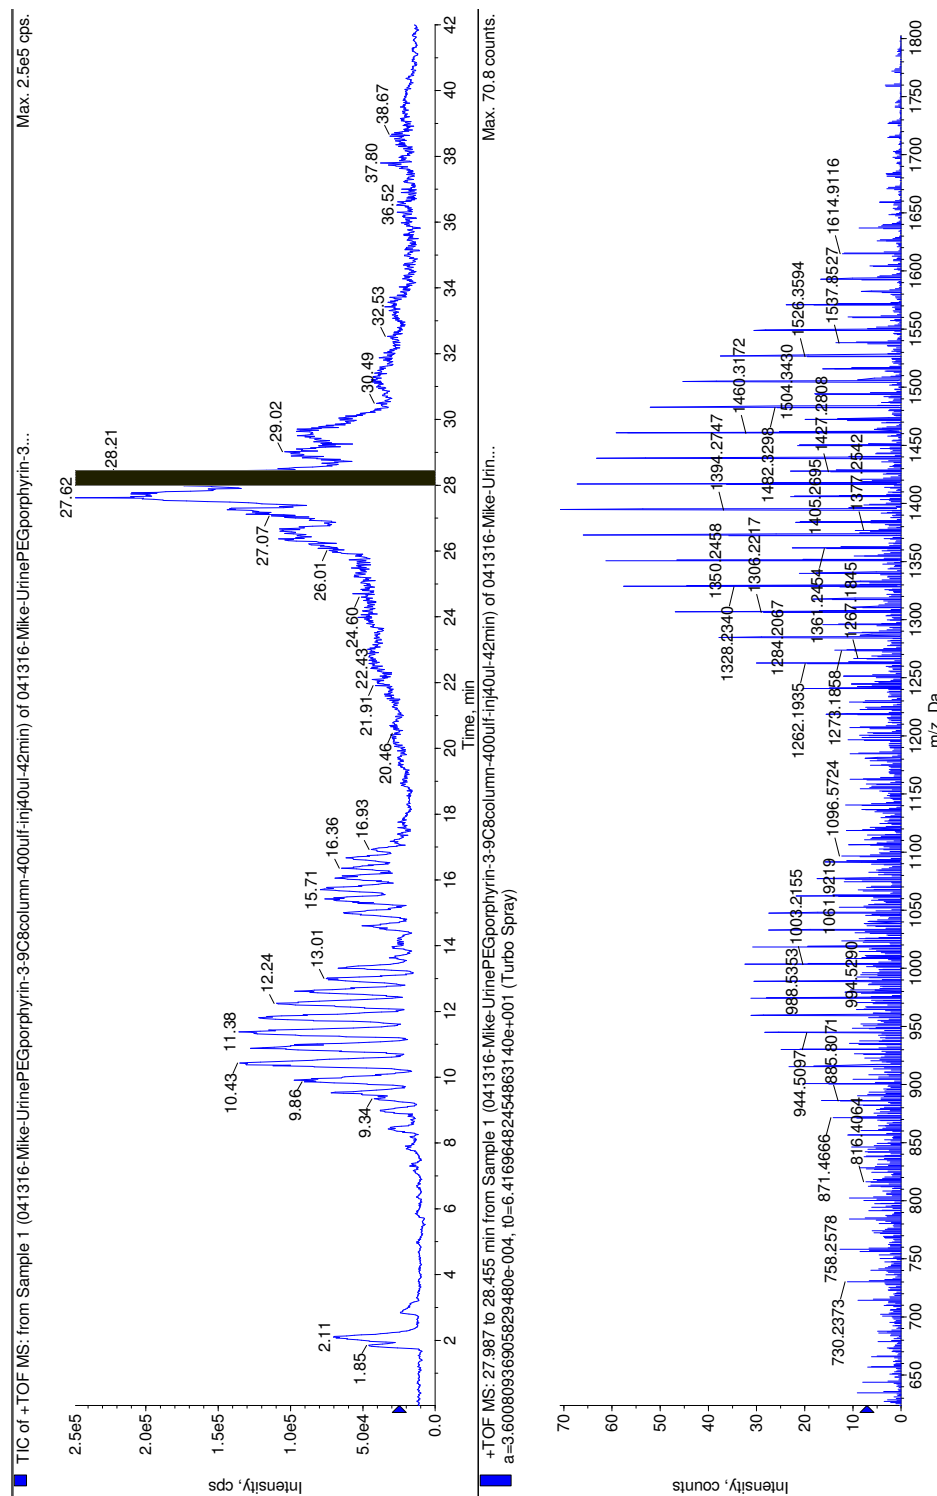

**Figure S51.** LC-MS of mouse urine extract ( $\text{CH}_2\text{Cl}_2$ ), obtained after injection of **4e**.

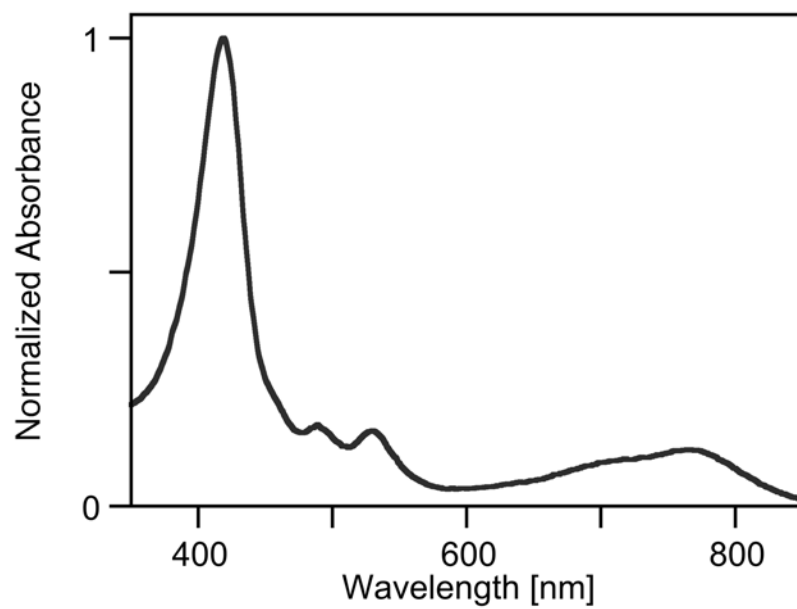

**Figure S52.** UV-vis spectrum ( $\text{CH}_2\text{Cl}_2$ ) of mouse (diluted) urine obtained after injection of **4e**.
