# Supplementary material
Source: PubMed Central journal article supplement (PMC5302001)
Supplement: NIHMS843575-supplement-TOC.pdf [file NIHMS843575-supplement-TOC.pdf]

## ***In vivo* photoacoustic tumor tomography using a quinoline-annulated porphyrin as NIR molecular contrast agent**

Michael Luciano, Mohsen Erfanzadeh, Feifei Zhou, Zhu Hua, Tobias Bornhütter, Beate Röder, Qing Zhu,\* and Christian Brückner\*

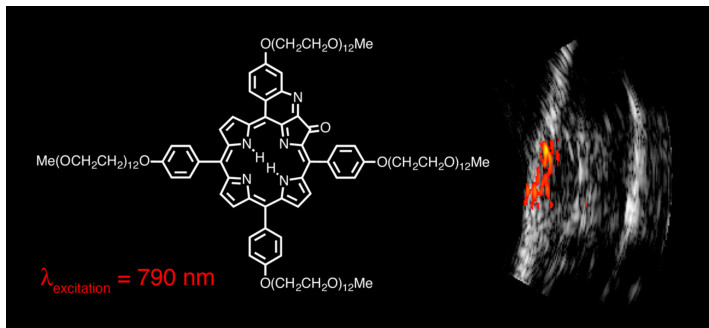

The water-soluble quinoline-annulated porphyrin, when irradiated within the optical window of tissue, shows in a mouse model high efficacy as a NIR photoacoustic tomography contrast agent.
